# Supplementary material for: Targeted protein degraders of SARS-CoV-2 Mpro demonstrate superior antiviral activity over enzymatic inhibition alone and potency against nirmatrelvir resistant virus
Source: Research Square preprint supplement (doi:10.21203/rs.3.rs-3932156/v1), 2024-11-25
Supplement: Supplementary file 1 [file 0436c6d89a6742910dc35b00.pdf]

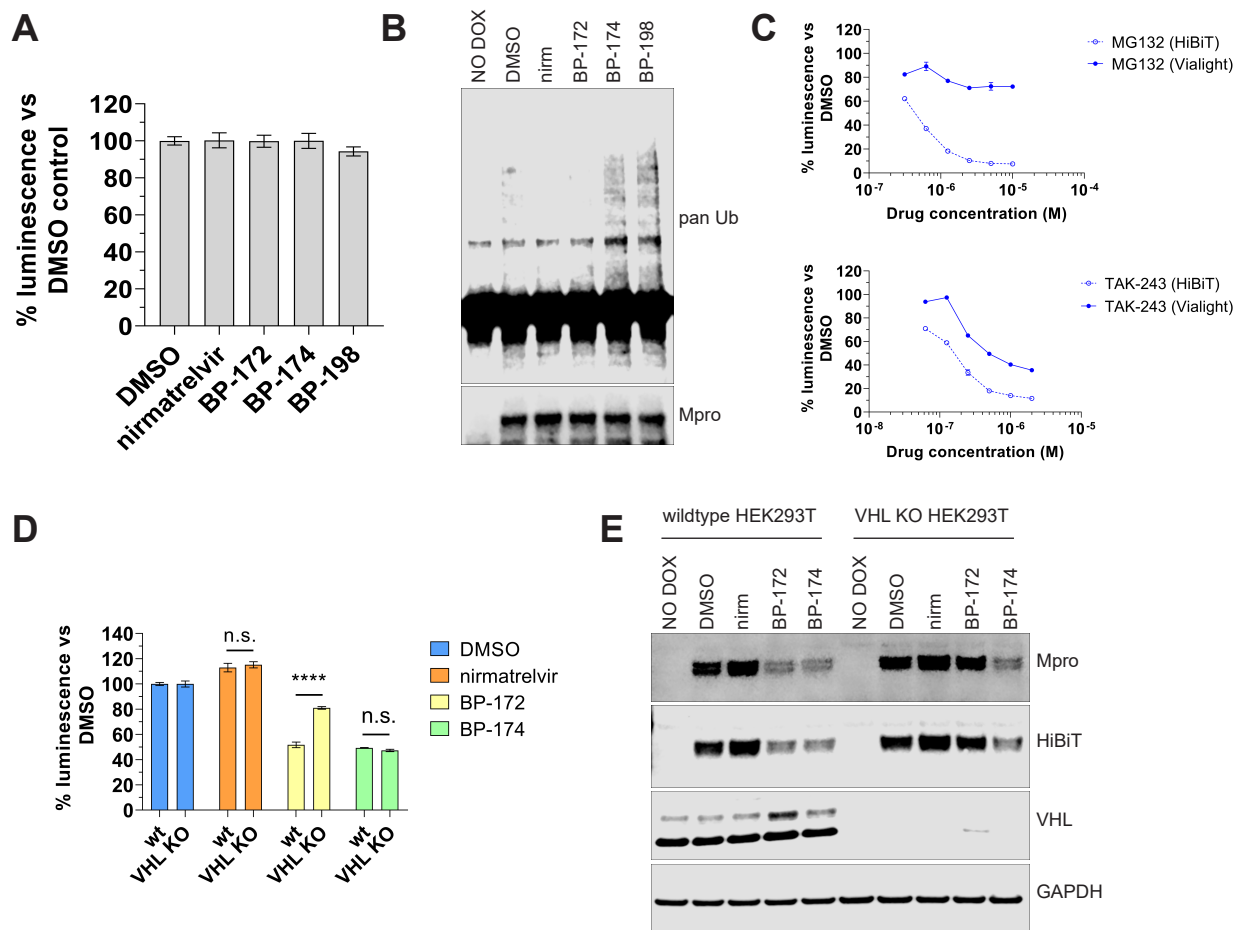

### Supplementary Figure 1

**(A)** Vialight cell viability results demonstrating no toxicity of the TPD candidates at 20  $\mu$ M. Data is presented as the % luminescence vs DMSO controls  $\pm$  S.E.M. **(B)** Western blot analysis demonstrating the ubiquitination of Mpro following 4 h of drug treatment in the presence of 5  $\mu$ M of proteasomal inhibitor MG132 followed by HiBiT immunoprecipitation and blotting for pan Ub and Mpro. **(C)** Combined HiBiT detection and Vialight cell viability analysis of HEK293T LVX Mpro-HiBiT cells treated with titrated MG132 or TAK-243 for 24 h. Data is presented as % luminescence vs DMSO controls  $\pm$  S.E.M. **(D)** HiBiT detection results and **(E)** orthogonal western blot verification results for singular TPD testing at 20  $\mu$ M for 24 h in the HEK293T LVX Mpro-HiBiT reporter expressed on a wildtype or VHL KO background. Data for HiBiT detection are presented as % luminescence vs DMSO controls  $\pm$  S.E.M. \*\*\*\* indicates  $P < 0.0001$  significant difference to matched wildtype control by one-way ANOVA. n.s. = not significant.

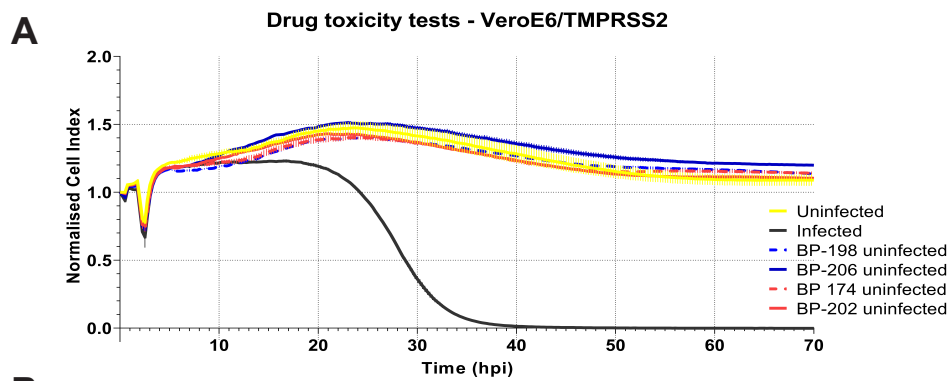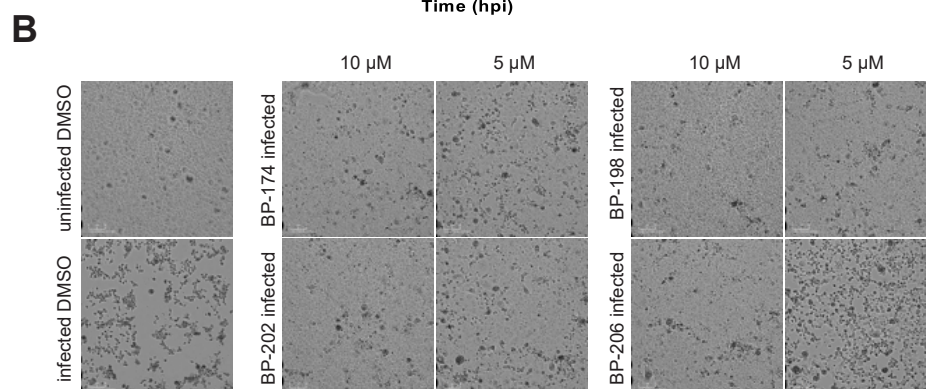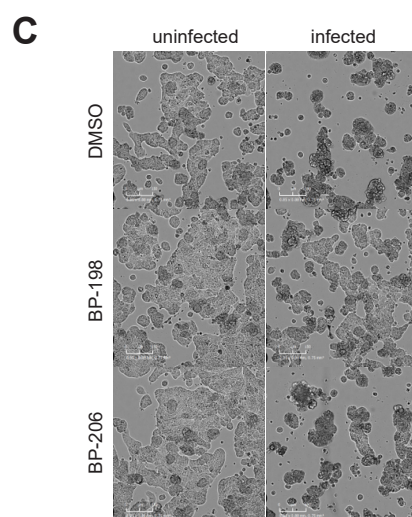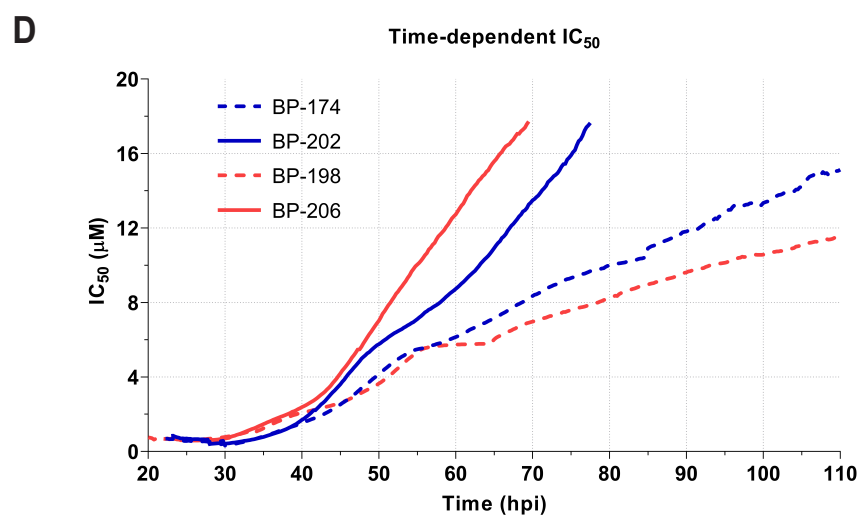

**E**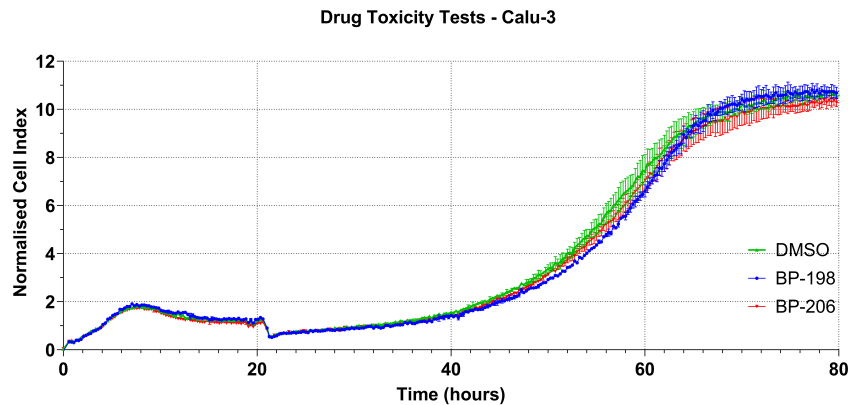**Supplementary Figure 2**

**(A)** xCELLigence real time cellular response profiles of VeroE6/TMPRSS2 cells treated with 10  $\mu$ M of each drug to confirm a lack of toxicity of the candidates in this cell model. Data are presented as normalised cell index (measuring cellular impedance) over time  $\pm$  S.E.M. **(B)** Microscopic images of VeroE6/TMPRSS2 cells treated with DMSO, BP-198 or BP-206 control at multiple concentrations at 51 hpi. Cytopathic effect of the virus can be observed in DMSO infected vs non-infected cells. Scale bar = 100  $\mu$ m. **(C)** Microscopic images of Calu-3 cells treated with DMSO, BP-198 or BP-206 control at 10  $\mu$ M at 37 hpi. Cytopathic effect of the virus can be observed in DMSO infected vs non-infected cells. Scale bar = 100  $\mu$ m. **(D)**  $IC_{50}$  for each drug calculated at 15 min intervals over the course of infection from experiments in Figure 3A and 3B. Data is presented as  $IC_{50}$  of each drug in  $\mu$ M  $\pm$  S.E.M over time. **(E)** xCELLigence real time cellular response profiles of Calu-3 cells treated with DMSO or 30  $\mu$ M of each drug in the absence of SARS-CoV-2 infection confirming a lack of toxicity of the candidates in this cell model. Data are presented as normalised cell index (measuring cellular impedance) over time  $\pm$  S.E.M.

**Supplementary Table 1: Summary of biochemical and degrader screening assay data for test compounds.**

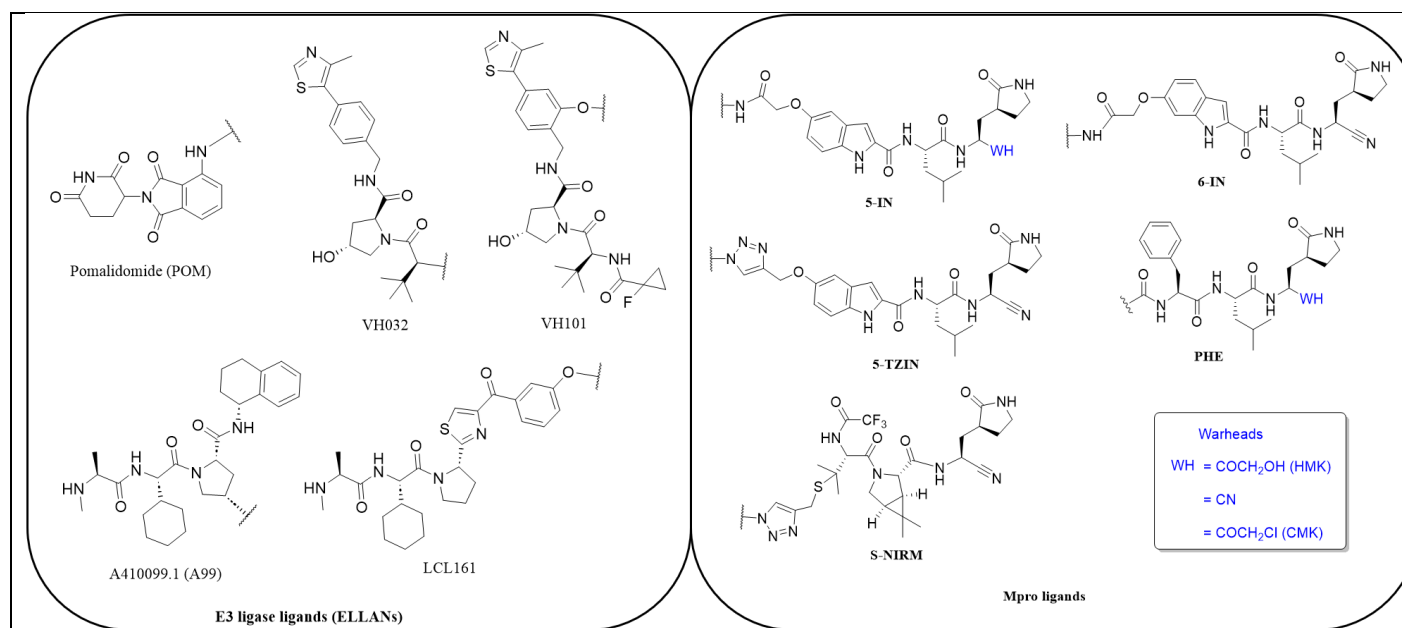

| BP-# | ELLAN | Linker | Mpro ligand  | Enzyme <sup>a</sup><br>IC <sub>50</sub> /nM | % Mpro <sup>b</sup><br>% vs DMSO |
|------|-------|--------|--------------|---------------------------------------------|----------------------------------|
| 121  | -     | -      | Nirmatrelvir | 7.3                                         | 124                              |
| 95   | -     | -      | PF-008353231 | 4.3                                         | 89                               |
| 100  | POM   |        | 5IN-HMK      | 165                                         | 96.7                             |
| 82   | POM   |        | 5IN-CN       | 3336                                        | 98.1                             |
| 108  | POM   |        | 5IN-CN       | 1910                                        | 91.1                             |
| 22   | VH032 |        | 5IN-CMK      | 45 <sup>aa</sup>                            | 90                               |
| 96   | VH032 |        | 5IN-CN       | 1590                                        | 80                               |
| 110  | VH032 |        | 5IN-CN       | 2570                                        | 80                               |
| 138  | VH101 |        | 5IN-CN       | 5750                                        | 86                               |
| 114  | A99   |        | 5IN-CN       | 1490                                        | 89                               |
| 148  | POM   |        | 6IN-CN       | 1890                                        | 78.8                             |
| 157  | POM   |        | 6IN-CN       | 2550                                        | 87.5                             |
| 158  | VH032 | direct | 6IN-CN       | 1770                                        | 88.5                             |
| 147  | VH032 |        | 6IN-CN       | 948                                         | 57.8                             |
| 153  | VH032 |        | 6IN-CN       | 1760                                        | 77.9                             |
| 151  | VH101 |        | 6IN-CN       | 6820                                        | 84.7                             |
| 75   | POM   |        | 5TZIN-CN     | 1030                                        | 93.3                             |
| 84   | VH032 |        | 5TZIN-CN     | 1080                                        | 73.3                             |
| 28   | VH032 |        | Phe-CMK      | 15                                          | 89                               |



|     |                          |                                                                                     |        |      |                    |
|-----|--------------------------|-------------------------------------------------------------------------------------|--------|------|--------------------|
| 122 | VH032                    | 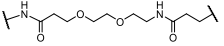   | Phe-CN | 570  | 90                 |
| 155 | POM                      |    | S-NIRM | 8.7  | 98.2               |
| 181 | POM                      |    | S-NIRM | 7.1  | 85.7               |
| 142 | VH032                    |    | S-NIRM | 8.6  | 88.9               |
| 177 | VH032                    |    | S-NIRM | 10.1 | 97.8               |
| 178 | VH032                    |    | S-NIRM | 7.4  | 88.6               |
| 172 | VH101                    |    | S-NIRM | 7.6  | 61.5               |
| 164 | A99                      |    | S-NIRM | 7.0  | 72.9               |
| 179 | A99                      |    | S-NIRM | 5.6  | 78                 |
| 174 | LCL161                   |    | S-NIRM | 6.7  | 36.8               |
| 196 | VH101                    |    | S-NIRM | 9.9  | 96 <sup>bb</sup>   |
| 197 | VH101                    |    | S-NIRM | 7.3  | 95 <sup>bb</sup>   |
| 198 | LCL161                   |    | S-NIRM | 7.3  | 28                 |
| 199 | LCL161                   |   | S-NIRM | 8.1  | 80 <sup>bb</sup>   |
| 203 | VH101                    |  | S-NIRM | 9.3  | 100                |
| 204 | LCL161                   |  | S-NIRM | 8.3  | 98.2 <sup>bb</sup> |
| 200 | VH101 <sup>cis-Hyp</sup> |  | S-NIRM | 8.0  | 92.3               |
| 202 | LCL161 <sup>N-Me</sup>   |  | S-NIRM | 8.2  | 67.6               |
| 206 | LCL161 <sup>N-Me</sup>   |  | S-NIRM | 8.8  | 65                 |

<sup>a</sup> Enzyme inhibition assays were performed as described in the Methods section. All results are  $n \geq 2$ , (SEM pIC50 < 0.1); <sup>aa</sup>  $n=1$

<sup>b</sup> Mpro degradation assays were performed as described in the Methods section. %Mpro refers to % HiBiT luminescence readout relative to DMSO control @ 20  $\mu$ M (<sup>bb</sup> @ 10  $\mu$ M). Lower percentage indicates greater degradation and target loss.

## Supplementary Methods

|     |                                                                                 |    |
|-----|---------------------------------------------------------------------------------|----|
| 1   | Compound Synthesis and Analysis General Methods .....                           | 2  |
| 1.1 | Synthesis of Azido-Linked VH101 Derivative .....                                | 3  |
| 1.2 | Synthesis of Azido-Linked cis-Hyp VH101 Derivative by Mitsunobu Inversion ..... | 4  |
| 1.3 | Synthesis of Azido-Linked LCL-161 Derivatives .....                             | 6  |
| 1.4 | Synthesis of Azido-Linked <i>N</i> -Methyl LCL-161 Derivatives .....            | 7  |
| 1.5 | Synthesis of Nirmatrelvir Derivative (S15) .....                                | 10 |
| 1.6 | Synthesis of Target Compounds (BP-172, 198, and 174) .....                      | 12 |
| 1.7 | Synthesis of Non-PROTAC Control Compounds (BP-200, 206, and 202) .....          | 15 |
| 2   | Selected NMR, HPLC, and HRMS spectra.....                                       | 19 |
| 2.1 | S15 .....                                                                       | 19 |
| 2.2 | BP-172.....                                                                     | 22 |
| 2.3 | BP-198.....                                                                     | 26 |
| 3   | References .....                                                                | 30 |

## 1 Compound Synthesis and Analysis General Methods

Commercial solvents and reagents were used as received unless otherwise indicated. Anhydrous tetrahydrofuran (THF), dichloromethane (DCM), toluene, and *N,N*-Dimethylformamide (DMF) were purchased from Sigma Aldrich. All air- and/or moisture-sensitive liquid reagents were transferred via a syringe. Solvents were concentrated under reduced pressure by rotary evaporation or using a stream of N<sub>2</sub>. Thin layer chromatography (TLC) was performed using Aluminium TLC plate, silica gel coated with fluorescent indicator F<sub>254</sub> (Merck KGA). TLC plates were visualised under ultraviolet light or by potassium permanganate (KMnO<sub>4</sub>) stain. Flash column chromatography were carried out following the procedure described by Still et al.,<sup>1</sup> using Silica gel 60 Å, 0.04-0.063 mm (400-230 mesh, Carl Roth). Preparative reversed-phase high-performance liquid chromatography (RP-HPLC) was performed on a Phenomenex Luna C18 column (5 µm, 100 Å, 150 x 21.2 mm) using a water 600 semi-prep HPLC incorporating a water 486 UV detector, with 0.1% trifluoroacetic acid (TFA) in H<sub>2</sub>O (mobile phase A) and 0.1% TFA in acetonitrile (MeCN) (mobile phase B) as eluents, purified fractions were combined and concentrated by lyophilisation.

<sup>1</sup>H nuclear magnetic resonance (NMR), <sup>13</sup>C NMR, and <sup>19</sup>F NMR spectra were recorded using Bruker Avance III Nanobay 400 MHz NMR spectrometer coupled to the BACS 60 automatic sample changer at room temperature. The spectrometer was equipped with a 5 mm PABBO BB-1H/D Z-GRD probe. All chemical shifts were reported in parts per million (ppm, δ scale). According to Fulmer et al.,<sup>2</sup> <sup>1</sup>H NMR spectra were referenced relative to residual protium in the deuterated solvent (CHCl<sub>3</sub>, δ 7.26 ppm; Methanol-d<sub>3</sub>, 3.31 ppm; DMSO-d<sub>5</sub>, δ 2.50 ppm; Acetone-d<sub>5</sub>, δ 2.05 ppm; Acetonitrile-d<sub>2</sub>, δ 1.94 ppm). <sup>13</sup>C NMR spectra were referenced to carbon resonances of deuterated solvent (CDCl<sub>3</sub>, δ 77.16 ppm; CD<sub>3</sub>OD, δ 49.00 ppm; DMSO-d<sub>6</sub>, δ 39.52 ppm; Acetone-d<sub>6</sub>, δ 29.84 ppm; CD<sub>3</sub>CN, δ 118.26 ppm). <sup>1</sup>H NMR spectra were reported in the following order: chemical shift, multiplicity (br = broad, s = singlet, d = doublet, t = triplet, q = quartet, p = pentet, dd = doublet of doublets, ddd = doublet of doublet of doublets, dddd = doublet of doublet of doublet of doublets, ddt = doublet of doublet of triplets, dt = doublet of triplets, dq = doublet of quartets, td = triplet of doublets, tdd = triplet of doublet of doublets, tt = triplet of triplets, app = apparent, m = multiplet), coupling constant in Hz (if available), and integration. <sup>13</sup>C NMR spectra were reported in the following order: chemical shift, distortionless enhancement by polarization transfer quaternary (DEPTQ, if available), multiplicity (if available), and coupling constant in Hz (if available). <sup>19</sup>F NMR spectra were reported in the following order: chemical shift, multiplicity (if available), and coupling constant in Hz (if available). All literature compounds have references after the chemical names, the NMR spectra are in agreement with the reported data unless otherwise stated.

Liquid chromatography-mass spectrometry (LCMS) were performed with an Agilent 1260 Infinity II LCMS SQ. Pump: 1260 Infinity II G7111B Quat pump. Autosampler: 1260 Infinity II G7129A 1260 Vialsampler. Detector: 1260 Infinity II G7117C DAD HS. Column: Poroshell 120 EC-C18, 3.0 x 50 mm, 2.7 µm. Column temperature: 35°C. Solvent A: 0.1% formic acid in H<sub>2</sub>O; solvent B: 0.1% formic acid in MeCN. Gradient: 5-100% B over 5 mins. Ion source: Quadrupole. Ion mode: MM-ES-APCI. Drying gas temperature: 350°C. Capillary voltage (V): 4000 (positive and negative).

High resolution mass spectrometry (HRMS) were performed with an Agilent 6224 TOF LC/MS Mass Spectrometer coupled to an Agilent 1290 Infinity (Agilent, Palo Alto, CA). All data were acquired, and reference mass was corrected via a dual-spray electrospray ionisation (ESI) source.

Purities were determined by Method A (Agilent 1260 Infinity Analytical HPLC coupled with a Zorbax Eclipse Plus C18 column (95 Å, 4.6 x 100 mm, 3.5 µm)) or Method B (Shimadzu LCMS-2020 system coupled with a

Phenomenex Luna C8 column (100 Å, 2.0 x 100 mm, 3 µm)). The purities of all final compounds are >95% unless otherwise indicated.

## Reaction general procedures

### General procedure A: O-alkylation

A reaction vial was charged with phenol, cesium carbonate ( $\text{Cs}_2\text{CO}_3$ ), and anhydrous DMF. The mixture was stirred under an  $\text{N}_2$  atmosphere at room temperature for 10 mins before the alkyl halide/pseudohalide was added. The reaction mixture was stirred at room temperature for the indicated period. The resulting mixture was quenched with  $\text{H}_2\text{O}$  and concentrated. The mixture was partitioned between ethyl acetate (EtOAc) and  $\text{H}_2\text{O}$ , the separate aqueous layer was extracted with EtOAc. The combined organic layer was washed with brine, dried over magnesium sulfate ( $\text{MgSO}_4$ ), filtered, and concentrated under reduced pressure to give a crude residue, which was purified by flash column chromatography.

### General procedure B: *tert*-butyloxycarbonyl (Boc) deprotection

A reaction vial was charged with Boc-amine, 4 M hydrochloride (HCl) in 1,4-dioxane, and DCM (if indicated). The reaction mixture was stirred at room temperature for 2 h. The resulting mixture was concentrated and dried under reduced pressure to provide the amine hydrochloride salt product, which was used for next step without further purification.

### General procedure C: copper-catalysed azide-alkyne cycloaddition (CuAAC) reaction

A reaction vial was charged with alkyne, azide, sodium ascorbate, copper sulfate pentahydrate ( $\text{CuSO}_4 \cdot 5\text{H}_2\text{O}$ ), and a 2:1 mixture of *tert*-butanol (t-BuOH) and  $\text{H}_2\text{O}$ . The reaction vial was capped and sealed. The reaction mixture was stirred at 40-45°C for indicated period. The resulting mixture was cooled to room temperature and concentrated. The residue was partitioned between EtOAc and  $\text{H}_2\text{O}$ , the separate aqueous layer was extracted with EtOAc. The combined organic layer was washed with brine, dried over  $\text{MgSO}_4$ , filtered, and concentrated under reduced pressure to give a crude residue, which was purified by flash column chromatography (or preparative TLC and preparative RP-HPLC if indicated).

## 1.1 Synthesis of Azido-Linked VH101 Derivative

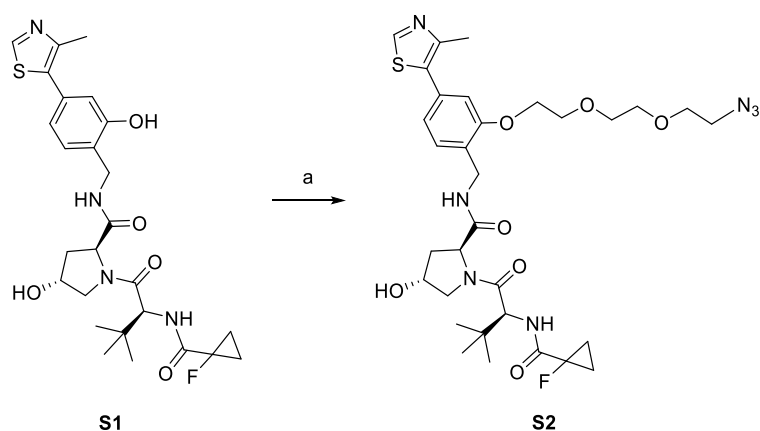

**Scheme S1** Reagents and conditions: (a) Cs<sub>2</sub>CO<sub>3</sub>, alkyl bromide, DMF, rt, 95%.

(2*S*,4*R*)-*N*-(2-(2-(2-(2-Azidoethoxy)ethoxy)ethoxy)-4-(4-methylthiazol-5-yl)benzyl)-1-((*S*)-2-(1-fluorocyclopropane-1-carboxamido)-3,3-dimethylbutanoyl)-4-hydroxypyrrolidine-2-carboxamide (**S2**)

Following general procedure A, (2*S*,4*R*)-1-((*S*)-2-(1-fluorocyclopropane-1-carboxamido)-3,3-dimethylbutanoyl)-4-hydroxy-*N*-(2-hydroxy-4-(4-methylthiazol-5-yl)benzyl)pyrrolidine-2-carboxamide, **S1**<sup>3</sup> (50.0 mg, 0.94 mmol), Cs<sub>2</sub>CO<sub>3</sub> (55.1 mg, 0.17 mmol), 1-azido-2-(2-(2-bromoethoxy)ethoxy)ethane (42.5 mg, 0.18 mmol), and DMF (0.3 mL) gave a light-yellow clear mixture. After 48 h, workup and flash column chromatography (EtOAc/petroleum ether/MeOH (methanol), gradient, 80:20:0 to 90:0:10) provided **S2** as a colourless clear solid (61.5 mg, 95%).

TLC: *R*<sub>f</sub> = 0.26 (EtOAc/MeOH, 90:10)

<sup>1</sup>H NMR (400 MHz, CDCl<sub>3</sub>) δ 8.69 (s, 1H), 7.33 (d, *J* = 7.8 Hz, 1H), 7.30 (d, *J* = 6.1 Hz, 1H), 7.02 (dd, *J* = 8.8, 2.7 Hz, 1H), 6.97 (dd, *J* = 7.7, 1.6 Hz, 1H), 6.91 (d, *J* = 1.6 Hz, 1H), 4.68 (t, *J* = 7.9 Hz, 1H), 4.52 (app br d, *J* = 8.0 Hz, 2H), 4.48 (dd, *J* = 6.0, 2.7 Hz, 2H), 4.27 – 4.15 (m, 2H), 4.02 – 3.97 (m, 1H), 3.96 – 3.88 (m, 2H), 3.80 – 3.75 (m, 2H), 3.72 – 3.62 (m, 5H), 3.37 (t, *J* = 5.0 Hz, 2H), 2.53 (s, 3H), 2.44 (ddd, *J* = 12.8, 7.7, 4.7 Hz, 1H), 2.14 – 2.06 (m, 1H), 1.36 – 1.25 (m, 4H, assumed; partially obscured by solvent peak), 0.96 (s, 9H).

<sup>19</sup>F NMR (377 MHz, CDCl<sub>3</sub>) δ -197.51.

<sup>13</sup>C NMR (100 MHz, CDCl<sub>3</sub>) δ 171.0, 170.6, 170.3, 157.0, 150.5, 132.2, 130.0, 122.2, 113.0, 71.0, 70.9, 70.5, 70.2, 69.9, 68.2, 58.6, 57.7, 56.7, 50.9, 39.2, 36.4, 35.4, 26.5, 16.1, 13.9, 13.8. Four carbons not observed.

HPLC *t*<sub>R</sub> (Method A): 8.8 min.

HRMS: Calc *m/z* for [(C<sub>32</sub>H<sub>44</sub>FN<sub>7</sub>O<sub>7</sub>S) + H]<sup>+</sup> 690.3080, found 690.3086.

## 1.2 Synthesis of Azido-Linked cis-Hyp VH101 Derivative by Mitsunobu Inversion

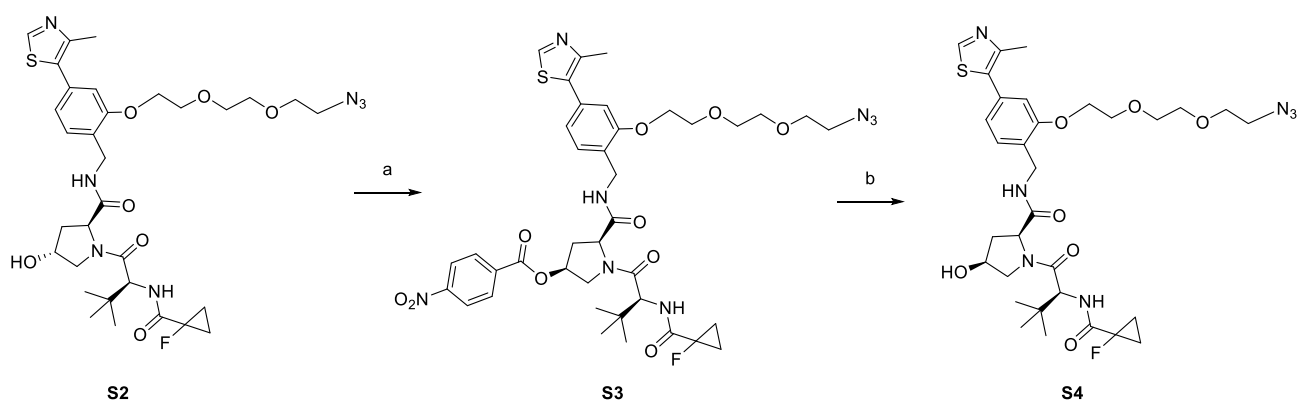

**Scheme S2** Reagents and conditions: (a) Di-*tert*-butyl azodicarboxylate (DTBAD), diphenyl-2-pyridylphosphine (Ph<sub>2</sub>PyP), 4-nitrobenzoic acid, THF, 0°C to rt. (b) Lithium hydroxide monohydrate (LiOH·H<sub>2</sub>O), THF, MeOH, H<sub>2</sub>O, rt, 60% over two steps.

(2*S*,4*S*)-*N*-(2-(2-(2-(2-Azidoethoxy)ethoxy)ethoxy)-4-(4-methylthiazol-5-yl)benzyl)-1-((*S*)-2-(1-fluorocyclopropane-1-carboxamido)-3,3-dimethylbutanoyl)-4-hydroxypyrrolidine-2-carboxamide (cis-VH101 **S4**)

A reaction vial was charged with DTBAD (58.4 mg, 0.25 mmol), Ph<sub>2</sub>PyP (66.8 mg, 0.25 mmol), and anhydrous THF (1.0 mL). The yellow clear mixture was stirred under an N<sub>2</sub> atmosphere at 0°C for 5 mins to form the light-yellow cloudy betaine, which was transferred to a separated reaction vial containing **S2** (50 mg, 0.072 mmol) and 4-nitrobenzoic acid (20.6 mg, 0.12 mmol). The yellow clear mixture was stirred at 0°C to room temperature for 18 h. The resulting light-yellow clear mixture was concentrated using a stream of N<sub>2</sub>, diluted in DCM, and purified by flash column chromatography (EtOAc/petroleum ether/MeOH, gradient, 80:20:0 to 95:0:5). **S3** was obtained as a colourless clear gum and used for the next step without further purification.

A reaction vial was charged with **S3**, LiOH.H<sub>2</sub>O (5.5 mg, 0.13 mmol), and MeOH/THF/H<sub>2</sub>O (0.3 mL, 1:1:1). The slightly yellow clear mixture was stirred at 0°C to room temperature for 18 h. The resulting light yellow clear mixture was placed at 0°C and acidified by HCl (0.27 mL, 0.27 mmol, 1 M in H<sub>2</sub>O). The mixture was concentrated using a stream of N<sub>2</sub>, partitioned between EtOAc (20 mL) and H<sub>2</sub>O (10 mL). The separate aqueous layer was extracted with EtOAc (15 mL x 3). The combined organic layer was washed with brine (5 mL), dried over MgSO<sub>4</sub>, filtered, and concentrated under reduced pressure to give a slightly yellow clear residue, which was purified by flash column chromatography (EtOAc/petroleum ether/MeOH, gradient, 80:20:0 to 90:0:10 followed by DCM/MeOH, gradient, 100:0 to 95:0). **S4** was obtained as a colourless clear solid (29.9 mg, 60% over two steps).

TLC: *R<sub>f</sub>* = 0.17 (DCM/MeOH, 95:5)

<sup>1</sup>H NMR (400 MHz, CDCl<sub>3</sub>) δ 8.68 (s, 1H), 7.58 (t, *J* = 6.2 Hz, 1H), 7.33 (d, *J* = 7.7 Hz, 1H), 6.97 (dd, *J* = 7.7, 1.6 Hz, 1H), 6.95 – 6.90 (m, 2H), 5.81 (d, *J* = 10.3 Hz, 1H), 4.68 (d, *J* = 8.6 Hz, 1H), 4.60 – 4.51 (m, 2H), 4.47 – 4.38 (m, 2H), 4.29 – 4.17 (m, 2H), 3.99 – 3.89 (m, 2H), 3.88 – 3.80 (m, 2H), 3.80 – 3.75 (m, 2H), 3.72 – 3.64 (m, 4H), 3.37 (t, *J* = 5.0 Hz, 2H), 2.52 (s, 3H), 2.26 (d, *J* = 14.1 Hz, 1H), 2.17 (ddd, *J* = 14.0, 9.0, 4.8 Hz, 1H), 1.40 – 1.23 (m, 4H, assumed; partially obscured by solvent peak), 0.91 (s, 9H).

<sup>19</sup>F NMR (377 MHz, CDCl<sub>3</sub>) δ -197.56.

<sup>13</sup>C NMR (100 MHz, CDCl<sub>3</sub>) δ 172.5, 171.3, 169.9, 169.7, 156.9, 150.5, 148.6, 132.7, 131.8, 130.0, 126.2, 122.2, 113.0, 82.9, 81.7, 79.6, 78.8, 71.2, 71.0, 70.9, 70.2, 69.9, 68.1, 60.0, 58.6, 57.0, 50.8, 42.4, 41.0, 39.4, 35.5, 26.3, 25.6, 24.0, 21.0, 20.3, 17.6, 17.4, 16.2, 14.8, 13.8, 13.7, 13.6.

HPLC *t<sub>R</sub>* (Method A): 9.2 min.

HRMS: Calc *m/z* for ([C<sub>32</sub>H<sub>44</sub>FN<sub>7</sub>O<sub>7</sub>S] + H)<sup>+</sup> 690.3080, found 690.3089.

### 1.3 Synthesis of Azido-Linked LCL-161 Derivatives

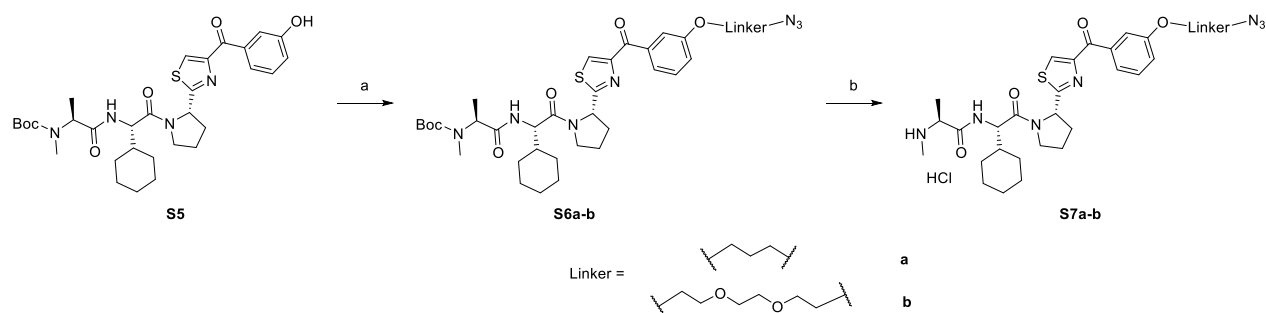

**Scheme S3** Reagents and conditions: (a)  $\text{Cs}_2\text{CO}_3$ , alkyl tosylate/bromide, DMF, rt, 59–77%. (b) HCl, 1,4-dioxane, DCM, rt, quant.

*tert*-Butyl ((*S*)-1-(((*S*)-2-((*S*)-2-(4-(3-(3-azidopropoxy)benzoyl)thiazol-2-yl)pyrrolidin-1-yl)-1-cyclohexyl-2-oxoethyl)amino)-1-oxopropan-2-yl)(methyl)carbamate (**S6a**)

Following general procedure A, *tert*-butyl ((*S*)-1-(((*S*)-1-cyclohexyl-2-((*S*)-2-(4-(3-hydroxybenzoyl)thiazol-2-yl)pyrrolidin-1-yl)-2-oxoethyl)amino)-1-oxopropan-2-yl)(methyl)carbamate, **S5**<sup>4</sup> (50.0 mg, 0.084 mmol),  $\text{Cs}_2\text{CO}_3$  (54.4 mg, 0.17 mmol), 3-azidopropyl 4-methylbenzenesulfonate (46.9 mg, 0.18 mmol), and DMF (0.4 mL) gave a brown-orange opaque mixture. After 18 h, workup and flash column chromatography (EtOAc/petroleum ether, 50:50 to 100:0) provided **S6a** as a light yellow clear solid (43.9 mg, 77%).

TLC:  $R_f$  = 0.28 (EtOAc/petroleum ether, 70:30).

$^1\text{H}$  NMR (400 MHz, MeOD) reporting the major isomer  $\delta$  8.33 (s, 1H), 7.78 – 7.63 (m, 2H), 7.44 (dd,  $J$  = 8.3, 7.5 Hz, 1H), 7.23 (ddd,  $J$  = 8.3, 2.6, 1.0 Hz, 1H), 5.49 (dd,  $J$  = 7.8, 3.1 Hz, 1H), 4.63 – 4.45 (m, 2H), 4.15 (t,  $J$  = 6.0 Hz, 2H), 4.03 – 3.92 (m, 1H), 3.95 – 3.85 (m, 1H), 3.54 (t,  $J$  = 6.6 Hz, 2H), 2.86 (s, 3H), 2.44 – 2.11 (m, 4H), 2.08 (p,  $J$  = 6.3 Hz, 2H), 1.76 – 1.54 (m, 6H), 1.46 (s, 9H), 1.36 – 1.32 (m, 3H), 1.17 – 0.99 (m, 5H).

LCMS (APCI): Calc  $m/z$  for  $([\text{C}_{34}\text{H}_{47}\text{N}_7\text{O}_6\text{S}] + \text{H})^+$  682.3, found 682.3.

HRMS: Calc  $m/z$  for  $([\text{C}_{34}\text{H}_{47}\text{N}_7\text{O}_6\text{S}] + \text{Na})^+$  704.3201, found 704.3214.

(*S*)-*N*-((*S*)-2-((*S*)-2-(4-(3-(3-Azidopropoxy)benzoyl)thiazol-2-yl)pyrrolidin-1-yl)-1-cyclohexyl-2-oxoethyl)-2-(methylamino)propanamide hydrochloride (**S7a**)

Following general procedure B, **S6a** (17.0 mg, 0.025 mmol), HCl (0.1 mL, 0.40 mmol, 4 M in 1,4-dioxane), and DCM (0.1 mL) gave a slightly yellow clear turned opaque mixture. Concentration and drying under reduced pressure provided **S7a** as an off-white foamy solid, which was used for the next step without further purification.

*tert*-Butyl ((*S*)-1-(((*S*)-2-((*S*)-2-(4-(3-(2-(2-(2-azidoethoxy)ethoxy)ethoxy)benzoyl)thiazol-2-yl)pyrrolidin-1-yl)-1-cyclohexyl-2-oxoethyl)amino)-1-oxopropan-2-yl)(methyl)carbamate (**S6b**)

Following general procedure A, **S5** (52.3 mg, 0.087 mmol),  $\text{Cs}_2\text{CO}_3$  (68.3 mg, 0.21 mmol), 1-azido-2-(2-(2-bromoethoxy)ethoxy)ethane (54.0 mg, 0.23 mmol), and DMF (0.4 mL) gave a brown-orange opaque mixture. After 18 h, workup and flash column chromatography (EtOAc/petroleum ether, 50:50 to 100:0) provided **S6b** as a pale yellow clear residue (39.1 mg, 59%).

TLC:  $R_f$  = 0.30 (EtOAc, 100).

$^1\text{H}$  NMR (400 MHz, MeOD) reporting the major isomer  $\delta$  8.32 (s, 1H), 7.78 – 7.68 (m, 2H), 7.44 (t,  $J$  = 7.9 Hz, 1H), 7.24 (ddd,  $J$  = 8.3, 2.7, 1.0 Hz, 1H), 5.49 (dd,  $J$  = 7.8, 3.2 Hz, 1H), 4.64 – 4.46 (m, 2H), 4.25 – 4.18 (m, 2H), 4.03 – 3.86 (m, 4H), 3.77 – 3.70 (m, 2H), 3.71 – 3.64 (m, 4H), 3.35 (t,  $J$  = 4.9 Hz, 2H), 2.86 (s, 3H), 2.43 – 2.09 (m, 4H), 1.78 – 1.55 (m, 6H), 1.47 (s, 9H), 1.34 (d,  $J$  = 7.2 Hz, 3H), 1.21 – 1.00 (m, 5H).

LCMS (APCI): Calc  $m/z$  for  $([\text{C}_{37}\text{H}_{53}\text{N}_7\text{O}_8\text{S}] + \text{H})^+$  756.4, found 756.3.

HRMS: Calc  $m/z$  for  $([\text{C}_{37}\text{H}_{53}\text{N}_7\text{O}_8\text{S}] + \text{Na})^+$  778.3569, found 778.3576.

(*S*)-*N*-((*S*)-2-((*S*)-2-(4-(3-(2-(2-Azidoethoxy)ethoxy)ethoxy)benzoyl)thiazol-2-yl)pyrrolidin-1-yl)-1-cyclohexyl-2-oxoethyl)-2-(methylamino)propanamide hydrochloride (**S7b**)

Following general procedure B, **S6** (17.7 mg, 0.023 mmol), HCl (0.1 mL, 0.40 mmol, 4 M in 1,4-dioxane), and DCM (0.1 mL) gave a colourless clear turned opaque mixture. Concentration and drying under reduced pressure provided **S7b** as a pale yellow solid, which was used for the next step without further purification.

#### 1.4 Synthesis of Azido-Linked *N*-Methyl LCL-161 Derivatives

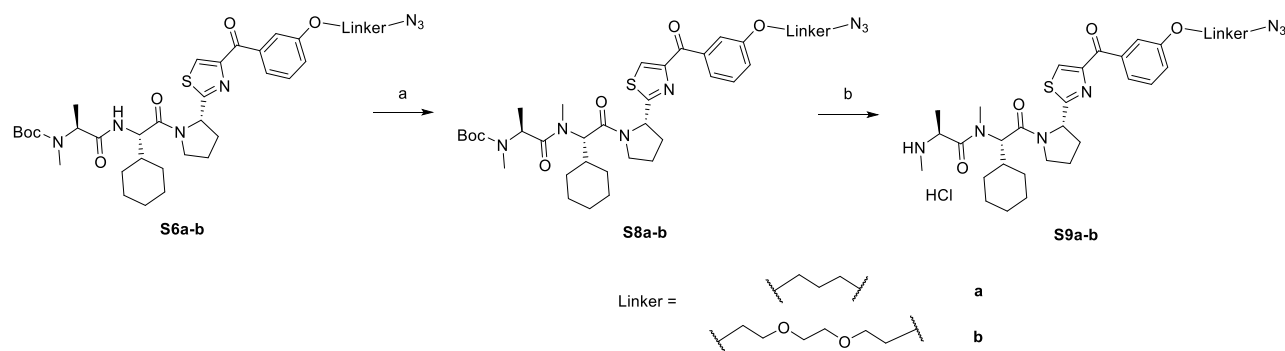

**Scheme S4** Reagents and conditions: (a) Sodium hydride (NaH), iodomethane (MeI), DMF, rt, 72-79%. (b) HCl, 1,4-dioxane, DCM, rt, quant.

*tert*-Butyl ((*S*)-1-(((*S*)-2-((*S*)-2-(4-(3-(3-azidopropoxy)benzoyl)thiazol-2-yl)pyrrolidin-1-yl)-1-cyclohexyl-2-oxoethyl)(methyl)amino)-1-oxopropan-2-yl)(methyl)carbamate (**S8a**)

A reaction vial was charged with **S6a** (31.1mg, 0.046 mmol), NaH (4.6 mg, 0.11 mmol, 60 % dispersion in mineral oil), and anhydrous DMF (0.15 mL). The yellow turned brown-red clear mixture was stirred under an  $\text{N}_2$  atmosphere at  $0^\circ\text{C}$  for 5 mins before MeI (19.4 mg, 0.14 mmol) was added. The red-brown clear reaction mixture was stirred at room temperature for 1 h. Another NaH (3.1 mg, 0.078 mmol, 60 % dispersion in mineral oil) was again added, stirring was continued at room temperature for another 3 h. The resulting yellow cloudy mixture was placed at ice bath, quenched with saturated  $\text{NH}_4\text{Cl}$  solution (0.5 mL), and concentrated using a stream of  $\text{N}_2$ . The mixture was partitioned between EtOAc (20 mL) and  $\text{H}_2\text{O}$  (10 mL), the separate aqueous layer was extracted with EtOAc (15 mL x 3). The combined organic layer was washed with brine (5 mL), dried over  $\text{MgSO}_4$ , filtered, and concentrated under reduced pressure to give a light-brown crude residue, which was purified by flash column chromatography (EtOAc/petroleum ether, gradient, 20:80 to 80:20). **S8a** was obtained as a light-yellow clear gum (22.7 mg, 72%). The product was co-eluted with impurities and used for the next step without further purification.



TLC:  $R_f$  = 0.43 (EtOAc/petroleum ether, 70:30).

$^1\text{H}$  NMR (400 MHz, MeOD) reporting characteristic signals  $\delta$  8.32 (s, 1H), 7.77 – 7.61 (m, 2H), 7.44 (t,  $J$  = 7.9 Hz, 1H), 7.25 – 7.21 (m, 1H), 5.47 – 5.41 (m, 1H, assumed; partially obscured by impurities), 5.17 – 5.07 (m, 2H, assumed; partially obscured by impurities), 4.15 (t,  $J$  = 6.0 Hz, 2H), 4.01 – 3.75 (m, 2H), 3.58 – 3.52 (m, 2H, assumed; partially obscured by impurities), 3.05 (s, 3H), 2.82 (s, 3H), 2.11 – 1.92 (m, 6H, assumed; partially obscured by impurities), 1.67 – 1.50 (m, 6H), 1.48 – 1.44 (m, 9H), 1.30 – 1.28 (m, 3H, assumed; partially obscured by impurities), 1.20 – 1.12 (m, 5H, assumed; partially obscured by impurities).

LCMS (APCI): Calc  $m/z$  for  $[(\text{C}_{35}\text{H}_{49}\text{N}_7\text{O}_6\text{S}) + \text{H}]^+$  696.4, found 696.3.

HRMS: Calc  $m/z$  for  $[(\text{C}_{35}\text{H}_{49}\text{N}_7\text{O}_6\text{S}) + \text{Na}]^+$  718.3357, found 718.3357.

(*S*)-*N*-((*S*)-2-((*S*)-2-(4-(3-(3-Azidopropoxy)benzoyl)thiazol-2-yl)pyrrolidin-1-yl)-1-cyclohexyl-2-oxoethyl)-*N*-methyl-2-(methylamino)propanamide hydrochloride (*N*-Me-LCL161 **S9a**)

Following general procedure B, **S8a** (16.0 mg, 0.023 mmol), HCl (0.1 mL, 0.40 mmol, 4 M in 1,4-dioxane), and DCM (0.1 mL) gave a light-yellow clear turned opaque mixture. Concentration and drying under reduced pressure provided **S9a** as a light yellow clear solid, which was used for the next step without further purification.

*tert*-Butyl ((*S*)-1-(((*S*)-2-((*S*)-2-(4-(3-(2-(2-(2-azidoethoxy)ethoxy)ethoxy)benzoyl)thiazol-2-yl)pyrrolidin-1-yl)-1-cyclohexyl-2-oxoethyl)(methyl)amino)-1-oxopropan-2-yl)(methyl)carbamate (**S8b**)

A reaction vial was charged with **S6b** (35.4mg, 0.047 mmol), NaH (4.7 mg, 0.12 mmol, 60 % dispersion in mineral oil), and anhydrous DMF (0.16 mL). The yellow turned brown clear mixture was stirred under an  $\text{N}_2$  atmosphere at room temperature for 5 mins before the MeI (19.9 mg, 0.14 mmol) was added. The brown reaction mixture was stirred at room temperature for 1 h. The resulting yellow cloudy mixture was placed at ice bath, quenched with saturated  $\text{NH}_4\text{Cl}$  solution (0.5 mL), and concentrated using a stream of  $\text{N}_2$ . The mixture was partitioned between EtOAc (20 mL) and  $\text{H}_2\text{O}$  (10 mL), the separate aqueous layer was extracted with EtOAc (15 mL x 3). The combined organic layer was washed with brine (5 mL), dried over  $\text{MgSO}_4$ , filtered, and concentrated under reduced pressure to give a dark-brown crude residue, which was purified by flash column chromatography (EtOAc/petroleum ether, gradient, 1:2 to 100:0). **S8b** was obtained as a yellow clear gum (28.5 mg, 79%). The product was co-eluted with impurities and used for the next step without further purification.

TLC:  $R_f$  = 0.32 (EtOAc/petroleum ether, 80:20).

$^1\text{H}$  NMR (400 MHz, MeOD) reporting the major isomer  $\delta$  8.31 (s, 1H), 7.79 – 7.63 (m, 2H), 7.44 (t,  $J$  = 8.0 Hz, 1H), 7.24 (ddd,  $J$  = 8.3, 2.7, 1.0 Hz, 1H), 5.44 (dd,  $J$  = 8.1, 3.1 Hz, 1H), 5.15 (d,  $J$  = 11.0 Hz, 1H), 5.10 – 5.01 (m, 1H), 4.24 – 4.19 (m, 2H), 3.93 – 3.80 (m, 4H), 3.75 – 3.71 (m, 2H), 3.69 – 3.65 (m, 4H), 3.35 (t,  $J$  = 4.9 Hz, 2H), 3.05 (s, 3H), 2.82 (s, 2H), 2.44 – 2.34 (m, 1H), 2.33 – 2.24 (m, 1H), 2.23 – 2.14 (m, 1H), 2.13 – 2.04 (m, 1H, assumed; partially obscured by impurities), 1.78 – 1.53 (m, 6H, assumed; partially obscured by impurities), 1.47 (s, 6H), 1.45 (s, 3H), 1.30 – 1.28 (m, 3H), 1.22 – 0.93 (m, 5H, assumed; partially obscured by impurities).

LCMS (APCI): Calc  $m/z$  for  $[(\text{C}_{38}\text{H}_{55}\text{N}_7\text{O}_8\text{S}) + \text{H}]^+$  770.4, found 770.3.

HRMS: Calc  $m/z$  for  $[(\text{C}_{38}\text{H}_{55}\text{N}_7\text{O}_8\text{S}) + 5\text{Na}]^{5+}$  176.8659, found 176.8657.

(*S*)-*N*-((*S*)-2-((*S*)-2-(4-(3-(2-(2-(2-Azidoethoxy)ethoxy)ethoxy)benzoyl)thiazol-2-yl)pyrrolidin-1-yl)-1-cyclohexyl-2-oxoethyl)-*N*-methyl-2-(methylamino)propenamide hydrochloride (*N*-Me-LCL161 **S9b**)

Following general procedure B, **S8b** (19.4 mg, 0.025 mmol), HCl (0.1 mL, 0.40 mmol, 4 M in 1,4-dioxane), and DCM (0.1 mL) gave a light-yellow clear turned opaque mixture. Concentration and drying under reduced pressure provided **S9b** as a light yellow clear solid, which was used for the next step without further purification.

## 1.5 Synthesis of Nirmatrelvir Derivative (S15)

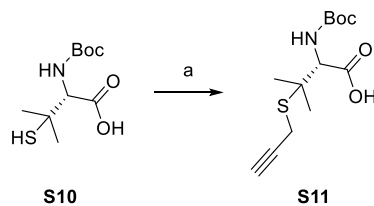

**Scheme S5** Reagents and conditions: (a) Propargyl bromide, sodium hydroxide (NaOH), H<sub>2</sub>O, ethanol (EtOH), rt, 96%.

(*R*)-2-((*tert*-Butoxycarbonyl)amino)-3-methyl-3-(prop-2-yn-1-ylthio)butanoic acid (**S11**)

A reaction vial was charged with (*R*)-2-((*tert*-butoxycarbonyl)amino)-3-mercapto-3-methylbutanoic acid, **S10** (176 mg, 0.71 mmol), NaOH (0.51 mL, 1.41 mmol, 10% aqueous solution), and EtOH (2.5 mL). The mixture was stirred at room temperature for 5 mins before propargyl bromide (0.080 mL, 0.71 mmol, 80% in toluene) was added. The light-yellow clear mixture was stirred at room temperature for 18 h. The reaction mixture was concentrated using a stream of N<sub>2</sub>. The resulting mixture was partitioned between EtOAc (40 mL) and 0.1 M HCl (7.0 mL), aqueous layer was extracted with EtOAc (30 mL x 3). The combined organic layer was washed with brine (10 mL), dried over MgSO<sub>4</sub>, filtered, and concentrated under reduced pressure to give **S11** as a slightly yellow clear gum (195 mg, 96%).

TLC: *R<sub>f</sub>* = 0.39 (EtOAc/petroleum ether/AcOH, 69:30:1)

<sup>1</sup>H NMR (400 MHz, CDCl<sub>3</sub>) δ 5.45 (d, *J* = 7.6 Hz, 1H), 4.39 (d, *J* = 8.6 Hz, 1H), 3.34 (d, *J* = 2.7 Hz, 2H), 2.24 (t, *J* = 2.7 Hz, 1H), 1.47 (s, 6H), 1.45 (s, 9H).

LCMS (APCI): Calc *m/z* for ([C<sub>13</sub>H<sub>21</sub>NO<sub>4</sub>S] – H)<sup>–</sup> 286.1, found 286.0.

HRMS: Calc *m/z* for (2[C<sub>13</sub>H<sub>21</sub>NO<sub>4</sub>S] + K)<sup>+</sup> 613.2014, found 613.2023.

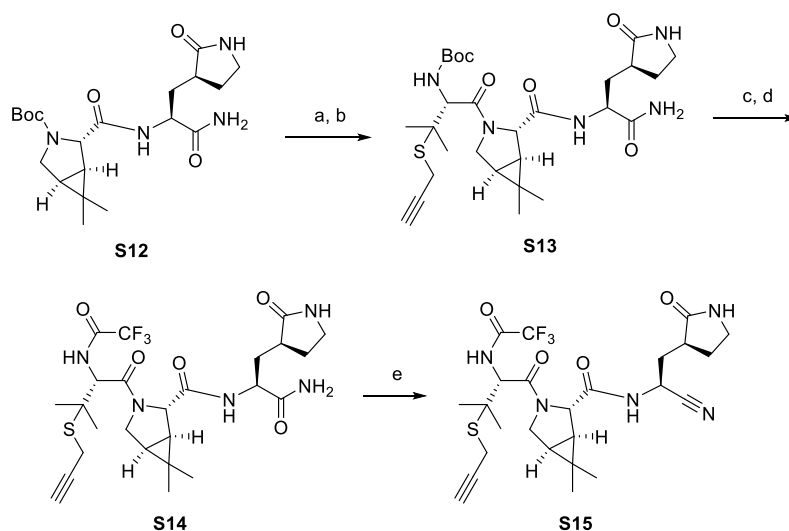

**Scheme S6** Reagents and conditions: (a) HCl, 1,4-dioxane, DCM, rt. (b) **S11**, hexafluorophosphate azabenzotriazole tetramethyl uronium (HATU), *N*-methylmorpholine (NMM), DMF, 0°C to rt, 76% over two steps. (c) TFA, DCM, rt. (d) (Trifluoroacetyl)benzotriazole (TFABt), triethylamine (Et<sub>3</sub>N), THF, rt, 99% over two steps. (e) Burgess reagent, DCM, rt, 74%.

*tert*-Butyl ((*R*)-1-((1*R*,2*S*,5*S*)-2-(((*S*)-1-amino-1-oxo-3-((*S*)-2-oxopyrrolidin-3-yl)propan-2-yl)carbamoyl)-6,6-dimethyl-3-azabicyclo[3.1.0]hexan-3-yl)-3-methyl-1-oxo-3-(prop-2-yn-1-ylthio)butan-2-yl)carbamate (**S13**)

Following general procedure B, *tert*-butyl (1*R*,2*S*,5*S*)-2-(((*S*)-1-amino-1-oxo-3-((*S*)-2-oxopyrrolidin-3-yl)propan-2-yl)carbamoyl)-6,6-dimethyl-3-azabicyclo[3.1.0]hexane-3-carboxylate, **S12**<sup>5</sup> (260 mg, 0.64 mmol) in DCM (0.5 mL), and HCl (2.39 mL, 0.96 mmol, 4 M in 1,4-dioxane) gave a light-yellow clear turned white cloudy mixture. After concentration and drying under reduced pressure provided (1*R*,2*S*,5*S*)-*N*-((*S*)-1-amino-1-oxo-3-((*S*)-2-oxopyrrolidin-3-yl)propan-2-yl)-6,6-dimethyl-3-azabicyclo[3.1.0]hexane-2-carboxamide hydrochloride as an off-white solid and used in the next step without further purification.

A reaction vial was charged with **S11** (192 mg, 0.67 mmol), HATU (266 mg, 0.70 mmol), NMM (193 mg, 0.21 mmol), and anhydrous DMF (1 mL) and was stirred under an N<sub>2</sub> atmosphere at room temperature for 5 mins. The preactivated carboxylic acid cocktail was then transferred to (1*R*,2*S*,5*S*)-*N*-((*S*)-1-amino-1-oxo-3-((*S*)-2-oxopyrrolidin-3-yl)propan-2-yl)-6,6-dimethyl-3-azabicyclo[3.1.0]hexane-2-carboxamide hydrochloride and rinsed with anhydrous DMF (1 mL x 2). The resulting yellow-opaque mixture was stirred at room temperature for 18 h. The reaction mixture was poured into pre-cooled saturated NaHCO<sub>3</sub> solution (3 mL) and concentrated using a stream of N<sub>2</sub>. The resulting mixture was partitioned between EtOAc (60 mL) and H<sub>2</sub>O (10 mL), aqueous layer was extracted with EtOAc (30 mL x 3). The combined organic layer was washed with brine (10 mL), dried over MgSO<sub>4</sub>, filtered, and concentrated under reduced pressure to give a crude residue, which was purified by flash column chromatography (EtOAc/MeOH/H<sub>2</sub>O, gradient, 100:0:0 to 85:10:5). **S13** was obtained as an off-white solid (279 mg, 76% over two steps).

TLC: *R*<sub>f</sub> = 0.30 (EtOAc/MeOH/H<sub>2</sub>O, 85:10:5)

<sup>1</sup>H NMR (400 MHz, CDCl<sub>3</sub>) δ 7.87 (d, *J* = 7.2 Hz, 1H), 7.09 (s, 1H), 5.71 (s, 1H), 5.40 (s, 1H), 5.27 (d, *J* = 10.4 Hz, 1H), 4.62 (d, *J* = 10.2 Hz, 1H), 4.46 (ddd, *J* = 10.4, 7.1, 5.4 Hz, 1H), 4.29 (s, 1H), 4.18 (dd, *J* = 10.4, 5.5 Hz, 1H), 4.01 (d, *J* = 10.4 Hz, 1H), 3.44 (t, *J* = 2.4 Hz, 2H), 3.40 – 3.37 (m, 1H), 3.37 – 3.35 (m, 1H), 2.45 – 2.41 (m, 1H), 2.41 – 2.37 (m, 1H), 2.30 (t, *J* = 2.6 Hz, 1H), 2.12 – 2.07 (m, 2H), 1.96 – 1.87 (m, 1H, assumed; partially obscured by solvent peak), 1.49 – 1.44 (m, 8H), 1.41 (s, 9H), 1.04 (s, 3H), 0.88 (s, 3H).

HRMS: Calc *m/z* for [(C<sub>28</sub>H<sub>43</sub>N<sub>5</sub>O<sub>6</sub>S) + H]<sup>+</sup> 578. 3007, found 578.3011.

(1*R*,2*S*,5*S*)-*N*-((*S*)-1-Amino-1-oxo-3-((*S*)-2-oxopyrrolidin-3-yl)propan-2-yl)-6,6-dimethyl-3-((*R*)-3-methyl-3-(prop-2-yn-1-ylthio)-2-(2,2,2-trifluoroacetamido)butanoyl)-3-azabicyclo[3.1.0]hexane-2-carboxamide (**S14**)

A reaction vial was charged with **S13** (147 mg, 0.25 mmol), DCM (0.6 mL), and TFA (768 mg, 7.61 mmol). The resulting light-yellow clear mixture was stirred at room temperature for 2.5 h. After concentration and drying under reduced pressure provided the residue was treated with TFABt (246 mg, 1.14 mmol, prepared from 1*H*-benzo[*d*][1,2,3]triazole and trifluoroacetic anhydride (TFAA)<sup>6</sup>), Et<sub>3</sub>N (77.0 mg, 0.76 mmol), and THF (1.5 mL). The resulting yellow clear mixture was stirred under an N<sub>2</sub> atmosphere at room temperature for 18 h. The reaction mixture was concentrated using a stream of N<sub>2</sub> and then purified by flash column chromatography (EtOAc/MeOH, gradient, 100:0 to 90:10). **S14** was obtained as an off-white solid (144 mg, 99% over two steps).

TLC: *R*<sub>f</sub> = 0.27 (EtOAc/MeOH/H<sub>2</sub>O, 85:10:5)

<sup>1</sup>H NMR (400 MHz, DMSO) δ 9.58 (d, *J* = 8.3 Hz, 1H), 8.29 (d, *J* = 8.8 Hz, 1H), 7.55 (s, 1H), 7.32 (s, 1H), 7.03 (s, 1H), 4.78 (d, *J* = 8.2 Hz, 1H), 4.34 – 4.27 (m, 1H), 4.26 (s, 1H), 3.96 (dd, *J* = 10.3, 5.4 Hz, 1H), 3.69 (d, *J* = 10.4

Hz, 1H), 3.40 (d,  $J = 2.6$  Hz, 2H), 3.18 – 3.07 (m, 2H), 3.04 (q,  $J = 8.6$  Hz, 1H), 2.44 – 2.31 (m, 1H), 2.19 – 2.09 (m, 1H), 1.97 – 1.89 (m, 1H), 1.71 – 1.61 (m, 1H), 1.55 – 1.45 (m, 5H), 1.40 (d,  $J = 7.7$  Hz, 1H), 1.36 (s, 3H), 1.02 (s, 3H), 0.84 (s, 3H).

$^{19}\text{F}$  NMR (377 MHz, DMSO)  $\delta$  -73.01.

HRMS: Calc  $m/z$  for  $[(\text{C}_{25}\text{H}_{34}\text{F}_3\text{N}_5\text{O}_5\text{S}) + \text{H}]^+$  574.2306, found 574.2308.

(1*R*,2*S*,5*S*)-*N*-((*S*)-1-Cyano-2-((*S*)-2-oxopyrrolidin-3-yl)ethyl)-6,6-dimethyl-3-((*R*)-3-methyl-3-(prop-2-yn-1-ylthio)-2-(2,2,2-trifluoroacetamido)butanoyl)-3-azabicyclo[3.1.0]hexane-2-carboxamide (**S15**)

A reaction vial was charged with **S14** (141 mg, 0.25 mmol), Burgess reagent (199 mg, 0.84 mmol), and anhydrous DCM (1.2 mL). The light-yellow clear mixture was stirred under an  $\text{N}_2$  atmosphere for 2 h before quenching with MeOH (0.5 mL). The resulting mixture was concentrated under reduced pressure and purified by flash column chromatography (EtOAc/petroleum ether, gradient, 80:20 to 100:0). **S15** was obtained as a white foamy solid (101 mg, 74%).

TLC:  $R_f = 0.28$  (EtOAc, 100)

$^1\text{H}$  NMR (400 MHz, DMSO)  $\delta$  9.60 (d,  $J = 8.3$  Hz, 1H), 9.01 (d,  $J = 8.5$  Hz, 1H), 7.67 (s, 1H), 4.97 (ddd,  $J = 10.6$ , 8.4, 5.3 Hz, 1H), 4.77 (d,  $J = 8.4$  Hz, 1H), 4.14 (s, 1H), 3.99 (dd,  $J = 10.4$ , 5.5 Hz, 1H), 3.71 (d,  $J = 10.4$  Hz, 1H), 3.40 (d,  $J = 2.7$  Hz, 2H), 3.17 – 3.11 (m, 2H), 3.09 – 3.01 (m, 1H), 2.44 – 2.34 (m, 1H), 2.18 – 2.05 (m, 2H), 1.78 – 1.67 (m, 2H), 1.59 (dd,  $J = 7.6$ , 5.4 Hz, 1H), 1.50 (s, 3H), 1.37 – 1.32 (m, 4H), 1.03 (s, 3H), 0.85 (s, 3H).

$^{19}\text{F}$  NMR (377 MHz, DMSO)  $\delta$  -73.00.

$^{13}\text{C}$  NMR (100 MHz, DMSO)  $\delta$  177.4, 170.4, 166.1, 120.2, 119.5, 80.9, 73.5, 60.2, 56.1, 48.8, 47.6, 37.9, 36.8, 34.0, 30.2, 27.2, 26.8, 25.6, 25.6, 23.8, 18.8, 16.0, 12.2. Two carbons not observed.

HRMS: Calc  $m/z$  for  $[(\text{C}_{25}\text{H}_{32}\text{F}_3\text{N}_5\text{O}_4\text{S}) + \text{H}]^+$  556.2200, found 556.2209.

## 1.6 Synthesis of Target Compounds (BP-172, 198, and 174)

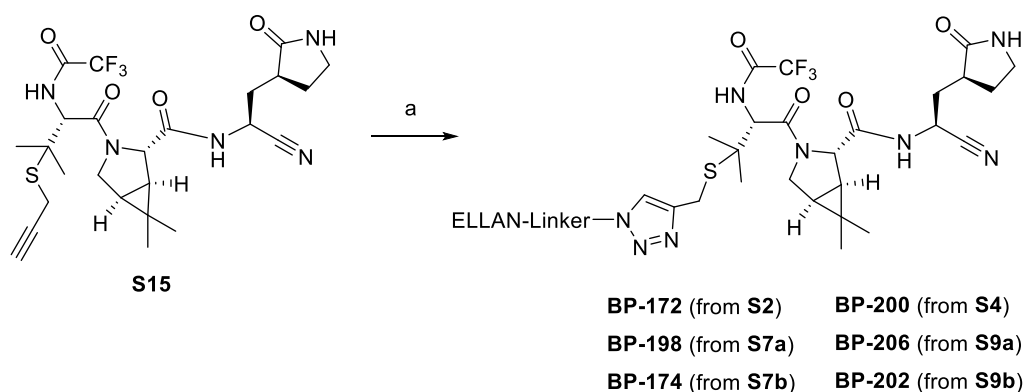

**Scheme S7** (a) ELLAN-Linker- $\text{N}_3$ ,  $\text{CuSO}_4 \cdot 5\text{H}_2\text{O}$ , sodium ascorbate,  $t\text{-BuOH}$ ,  $\text{H}_2\text{O}$ , 40–45°C.

(1*R*,2*S*,5*S*)-*N*-((*S*)-1-Cyano-2-((*S*)-2-oxopyrrolidin-3-yl)ethyl)-3-((*R*)-3-(((1-(2-(2-(2-(2-(((2*S*,4*R*)-1-((*S*)-2-(1-fluorocyclopropane-1-carboxamido)-3,3-dimethylbutanoyl)-4-hydroxypyrrolidine-2-carboxamido)methyl)-

5-(4-methylthiazol-5-yl)phenoxy)ethoxy)ethoxy)ethyl)-1*H*-1,2,3-triazol-4-yl)methyl)thio)-3-methyl-2-(2,2,2-trifluoroacetamido)butanoyl)-6,6-dimethyl-3-azabicyclo[3.1.0]hexane-2-carboxamide (**BP-172**)

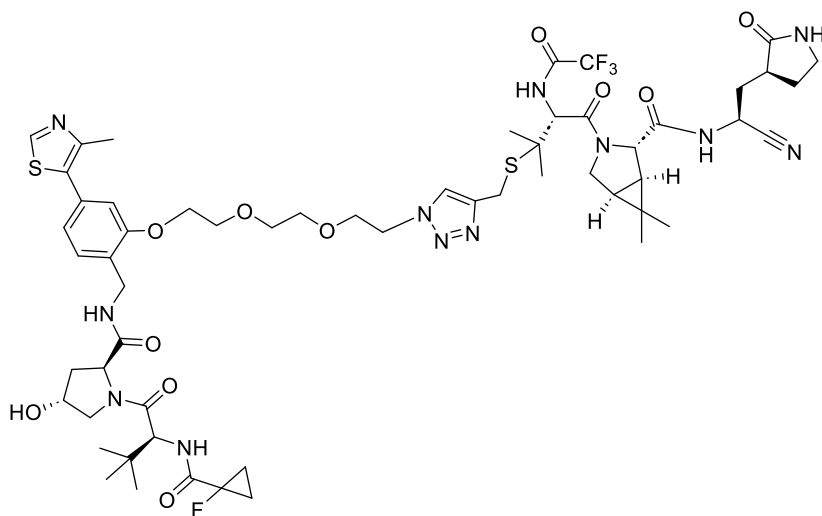

Following general procedure C, **S15** (13.7 mg, 0.025 mmol), **S2** (17.2 mg, 0.025 mmol), sodium ascorbate (2.9 mg, 0.015 mmol), CuSO<sub>4</sub>·5H<sub>2</sub>O (1.9 mg, 0.0074 mmol), and a degassed mixture of t-BuOH and H<sub>2</sub>O (1 mL) gave a slightly yellow clear mixture. After 18 h, workup and flash column chromatography (CHCl<sub>3</sub>/MeOH, gradient, 100:0 to 94:6) provided **BP-172** as a white solid (12.7 mg, 41%).

TLC: *R<sub>f</sub>* = 0.27 (CHCl<sub>3</sub>/MeOH, 90:10)

<sup>1</sup>H NMR (400 MHz, DMSO) δ 9.58 (d, *J* = 8.3 Hz, 1H), 9.05 – 8.94 (m, 2H), 8.46 (t, *J* = 5.8 Hz, 1H), 7.89 (s, 1H), 7.64 (s, 1H), 7.40 (d, *J* = 7.8 Hz, 1H), 7.27 (br d, *J* = 9.2 Hz, 1H), 7.03 (d, *J* = 1.2 Hz, 1H), 6.97 (d, *J* = 7.4 Hz, 1H), 5.15 (d, *J* = 3.6 Hz, 1H), 5.04 – 4.91 (m, 1H), 4.72 (d, *J* = 8.1 Hz, 1H), 4.59 (d, *J* = 9.4 Hz, 1H), 4.51 (t, *J* = 8.2 Hz, 1H), 4.46 (t, *J* = 5.2 Hz, 2H), 4.36 – 4.31 (m, 1H), 4.29 (d, *J* = 6.1 Hz, 1H), 4.23 (d, *J* = 5.6 Hz, 1H), 4.19 – 4.15 (m, 2H), 4.15 (s, 1H), 3.97 (dd, *J* = 10.3, 5.5 Hz, 1H), 3.84 (s, 2H), 3.80 (t, *J* = 5.2 Hz, 2H), 3.76 (t, *J* = 4.6 Hz, 2H), 3.70 – 3.63 (m, 2H), 3.62 – 3.58 (m, 3H), 3.57 – 3.53 (m, 2H), 3.12 (t, *J* = 8.9 Hz, 1H), 3.03 (q, *J* = 8.7 Hz, 1H), 2.46 (s, 3H), 2.41 – 2.33 (m, 1H), 2.18 – 2.03 (m, 3H), 1.96 – 1.88 (m, 1H), 1.77 – 1.64 (m, 2H), 1.57 (app t, *J* = 6.5 Hz, 1H), 1.47 (s, 3H), 1.41 – 1.31 (m, 6H), 1.25 – 1.20 (m, 2H), 1.03 (s, 3H), 0.95 (s, 9H), 0.84 (s, 3H).

<sup>19</sup>F NMR (377 MHz, DMSO) δ -73.01, -196.20.

HPLC *t<sub>R</sub>* (Method B): 16.1 min.

HRMS: Calc *m/z* for ([C<sub>57</sub>H<sub>76</sub>F<sub>4</sub>N<sub>12</sub>O<sub>11</sub>S<sub>2</sub>] + H)<sup>+</sup> 1245.5238, found 1245.5207.

(1*R*,2*S*,5*S*)-*N*-((*S*)-1-Cyano-2-((*S*)-2-oxopyrrolidin-3-yl)ethyl)-3-((*R*)-3-(((1-(3-(3-(2-((*S*)-1-((*S*)-2-cyclohexyl-2-((*S*)-2-(methylamino)propanamido)acetyl)pyrrolidin-2-yl)thiazole-4-carbonyl)phenoxy)propyl)-1*H*-1,2,3-triazol-4-yl)methyl)thio)-3-methyl-2-(2,2,2-trifluoroacetamido)butanoyl)-6,6-dimethyl-3-azabicyclo[3.1.0]hexane-2-carboxamide trifluoroacetic acid (**BP-198**)

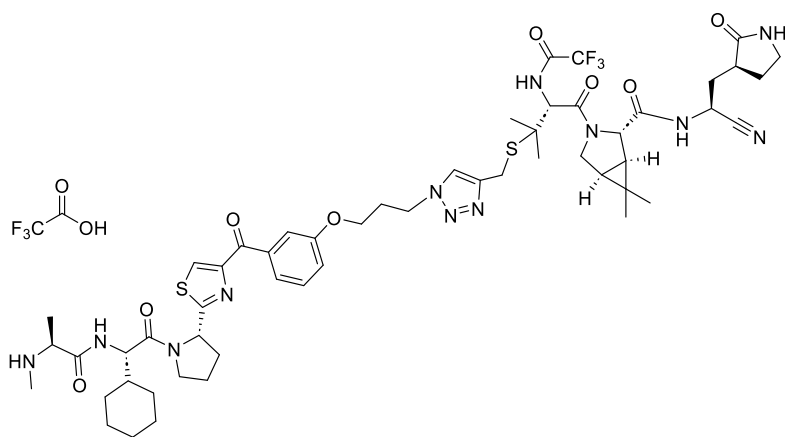

Following general procedure C, **S15** (14.1 mg, 0.025 mmol), **S7a** (0.025 mmol), sodium ascorbate (9.9 mg, 0.050 mmol), CuSO<sub>4</sub>·5H<sub>2</sub>O (9.3 mg, 0.037 mmol), and a degassed mixture of t-BuOH and H<sub>2</sub>O (0.6 mL) gave a light-yellow-brown opaque mixture. After 18 h, workup (neutralised using NaHCO<sub>3</sub> solution), flash column chromatography (CHCl<sub>3</sub>/7M NH<sub>3</sub> in MeOH, gradient, 100:0 to 96:4) and preparative RP-HPLC provided **BP-198** as a white solid (4.8 mg, 15% over two steps).

TLC:  $R_f$  = 0.22 (CHCl<sub>3</sub>/7M NH<sub>3</sub> in MeOH, 95:5)

<sup>1</sup>H NMR (400 MHz, DMSO)  $\delta$  9.61 (d,  $J$  = 8.3 Hz, 1H), 9.01 (d,  $J$  = 8.6 Hz, 1H), 8.78 (br s, 2H), 8.72 (d,  $J$  = 8.0 Hz, 1H), 8.49 (s, 1H), 7.99 (s, 1H), 7.73 – 7.64 (m, 2H), 7.62 (t,  $J$  = 2.1 Hz, 1H), 7.46 (t,  $J$  = 7.9 Hz, 1H), 7.23 (dd,  $J$  = 8.1, 2.7 Hz, 1H), 5.39 (dd,  $J$  = 7.3, 3.6 Hz, 1H), 4.96 (ddd,  $J$  = 10.4, 8.3, 5.4 Hz, 1H), 4.69 (d,  $J$  = 8.5 Hz, 1H), 4.55 – 4.43 (m, 3H), 4.14 (s, 1H), 4.05 (t,  $J$  = 6.0 Hz, 2H), 3.96 (dd,  $J$  = 10.6, 4.9 Hz, 1H), 3.91 – 3.71 (m, 5H), 3.66 (d,  $J$  = 10.6 Hz, 1H), 3.15 – 3.09 (m, 1H), 3.06 – 2.99 (m, 1H), 2.51 – 2.50 (m, 3H, assumed; partially obscured by solvent peak), 2.40 – 2.34 (m, 1H), 2.32 – 2.26 (m, 2H), 2.25 – 2.17 (m, 2H), 2.14 – 2.02 (m, 4H), 1.83 – 1.51 (m, 9H), 1.48 (s, 3H), 1.42 – 1.19 (m, 7H), 1.16 – 0.91 (m, 8H), 0.83 (s, 3H).

<sup>19</sup>F NMR (377 MHz, DMSO)  $\delta$  -72.99, -74.04.

HPLC  $t_R$  (Method B): 15.4 min.

HRMS: Calc  $m/z$  for ([C<sub>54</sub>H<sub>71</sub>F<sub>3</sub>N<sub>12</sub>O<sub>8</sub>S<sub>2</sub>] + H)<sup>+</sup> 1137.4984, found 1137.5003.

(1*R*,2*S*,5*S*)-*N*-((*S*)-1-Cyano-2-((*S*)-2-oxopyrrolidin-3-yl)ethyl)-3-((*R*)-3-(((1-(2-(2-(2-(3-(2-((*S*)-1-((*S*)-2-cyclohexyl-2-((*S*)-2-(methylamino)propanamido)acetyl)pyrrolidin-2-yl)thiazole-4-carbonyl)phenoxy)ethoxy)ethoxy)ethyl)-1*H*-1,2,3-triazol-4-yl)methyl)thio)-3-methyl-2-(2,2,2-trifluoroacetamido)butanoyl)-6,6-dimethyl-3-azabicyclo[3.1.0]hexane-2-carboxamide (**BP-174**)

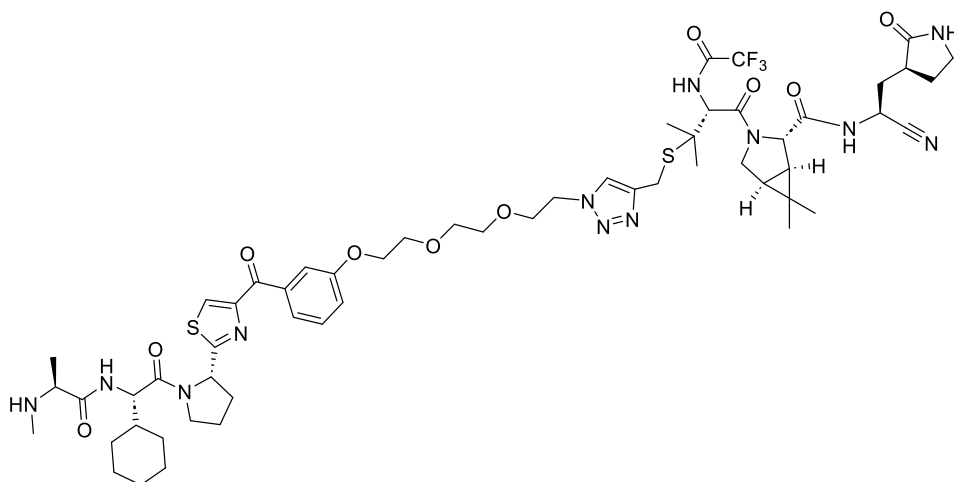

Following general procedure C, **S15** (13.0 mg, 0.023 mmol), **S7b** (0.023 mmol), sodium ascorbate (9.3 mg, 0.047 mmol), CuSO<sub>4</sub>·5H<sub>2</sub>O (8.8 mg, 0.035 mmol), and a degassed mixture of t-BuOH and H<sub>2</sub>O (1 mL) gave a light-yellow-brown clear mixture. After 18 h, workup (neutralised using NaHCO<sub>3</sub> solution) and flash column chromatography (CHCl<sub>3</sub>/7M NH<sub>3</sub> in MeOH, gradient, 100:0 to 96:4) provided **BP-174** as an off-white foamy solid (7.7 mg, 27% over two steps).

TLC: *R<sub>f</sub>* = 0.23 (CHCl<sub>3</sub>/7M NH<sub>3</sub> in MeOH, 95:5)

<sup>1</sup>H NMR (400 MHz, DMSO) δ 9.60 (s, 1H), 9.00 (d, *J* = 8.4 Hz, 1H), 8.48 (s, 1H), 7.97 – 7.85 (m, 2H), 7.75 – 7.60 (m, 3H), 7.46 (t, *J* = 8.0 Hz, 1H), 7.24 (dd, *J* = 8.3, 2.3 Hz, 1H), 5.38 (dd, *J* = 7.9, 3.0 Hz, 1H), 5.01 – 4.93 (m, 1H), 4.72 (s, 1H), 4.54 – 4.42 (m, 3H), 4.19 – 4.10 (m, 3H), 3.97 (dd, *J* = 10.7, 5.6 Hz, 1H), 3.88 – 3.75 (m, 6H), 3.74 (t, *J* = 4.6 Hz, 2H), 3.68 (d, *J* = 10.6 Hz, 1H), 3.60 – 3.52 (m, 4H), 3.14 – 3.08 (m, 1H, assumed; partially obscured by solvent peak), 3.06 – 3.01 (m, 1H, assumed; partially obscured by solvent peak), 2.96 (q, *J* = 6.8 Hz, 1H, assumed; partially obscured by solvent peak), 2.40 – 2.36 (m, 1H), 2.30 – 2.22 (m, 2H), 2.17 (s, 3H), 2.14 – 1.98 (m, 4H), 1.80 – 1.51 (m, 9H), 1.47 (s, 3H), 1.37 – 1.30 (m, 4H), 1.18 – 1.05 (m, 6H), 1.02 (s, 3H), 1.00 – 0.94 (m, 2H), 0.83 (s, 3H).

<sup>19</sup>F NMR (377 MHz, DMSO) δ -73.00.

HPLC *t<sub>R</sub>* (Method B): 15.6 min.

HRMS: Calc *m/z* for ([C<sub>57</sub>H<sub>77</sub>F<sub>3</sub>N<sub>12</sub>O<sub>10</sub>S<sub>2</sub>] + H)<sup>+</sup> 1211.5352, found 1211.5342.

### 1.7 Synthesis of Non-PROTAC Control Compounds (BP-200, 206, and 202)

(1*R*,2*S*,5*S*)-*N*-((*S*)-1-Cyano-2-((*S*)-2-oxopyrrolidin-3-yl)ethyl)-3-((*R*)-3-(((1-(2-(2-(2-(2-(((2*S*,4*S*)-1-((*S*)-2-(1-fluorocyclopropane-1-carboxamido)-3,3-dimethylbutanoyl)-4-hydroxypyrrolidine-2-carboxamido)methyl)-5-(4-methylthiazol-5-yl)phenoxy)ethoxy)ethoxy)ethyl)-1*H*-1,2,3-triazol-4-yl)methyl)thio)-3-methyl-2-(2,2,2-trifluoroacetamido)butanoyl)-6,6-dimethyl-3-azabicyclo[3.1.0]hexane-2-carboxamide (**BP-200**, *cis*-VH101 linked)



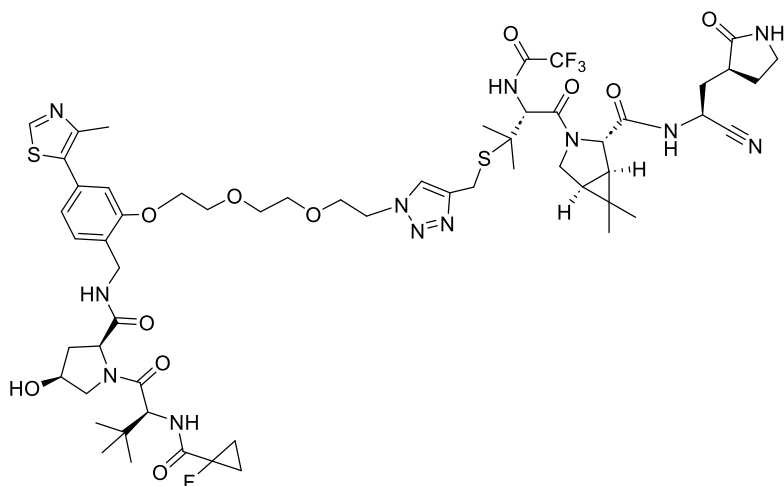

Following general procedure C, **S15** (13.5 mg, 0.024 mmol), **S4** (16.0 mg, 0.023 mmol), sodium ascorbate (2.8 mg, 0.014 mmol), CuSO<sub>4</sub>·5H<sub>2</sub>O (1.7 mg, 0.0070 mmol), and a degassed mixture of t-BuOH and H<sub>2</sub>O (0.6 mL) gave a slightly yellow clear mixture. After 18 h, workup and preparative TLC (EtOAc/MeOH/H<sub>2</sub>O, 85:10:5) provided **BP-200** as a white solid (13.9 mg, 48%).

TLC:  $R_f$  = 0.28 (EtOAc/MeOH/H<sub>2</sub>O, 85:10:5)

<sup>1</sup>H NMR (400 MHz, DMSO)  $\delta$  9.61 (d,  $J$  = 8.2 Hz, 1H), 9.01 (d,  $J$  = 8.5 Hz, 1H), 8.98 (s, 1H), 8.55 (t,  $J$  = 6.0 Hz, 1H), 7.89 (s, 1H), 7.65 (s, 1H), 7.40 (d,  $J$  = 7.8 Hz, 1H), 7.30 (dd,  $J$  = 8.9, 2.7 Hz, 1H), 7.04 (d,  $J$  = 1.7 Hz, 1H), 6.95 (dd,  $J$  = 7.8, 1.6 Hz, 1H), 5.44 (d,  $J$  = 7.3 Hz, 1H), 5.01 – 4.92 (m, 1H), 4.72 (d,  $J$  = 8.0 Hz, 1H), 4.55 (d,  $J$  = 8.9 Hz, 1H), 4.49 – 4.41 (m, 3H), 4.33 (dd,  $J$  = 16.5, 6.2 Hz, 1H), 4.27 – 4.19 (m, 2H), 4.17 (t,  $J$  = 4.7 Hz, 2H), 4.14 (s, 1H), 3.97 (dd,  $J$  = 10.4, 5.4 Hz, 1H), 3.90 – 3.82 (m, 3H), 3.80 (t,  $J$  = 5.2 Hz, 2H), 3.76 (t,  $J$  = 4.7 Hz, 2H), 3.68 (d,  $J$  = 10.5 Hz, 1H), 3.62 – 3.57 (m, 2H), 3.57 – 3.52 (m, 2H), 3.46 (dd,  $J$  = 10.1, 5.3 Hz, 1H), 3.12 (t,  $J$  = 9.0 Hz, 1H), 3.02 (q,  $J$  = 9.2, 8.7 Hz, 1H), 2.46 (s, 3H), 2.40 – 2.32 (m, 2H), 2.18 – 2.02 (m, 2H), 1.79 – 1.65 (m, 3H), 1.59 – 1.55 (m, 1H), 1.47 (s, 3H), 1.40 – 1.28 (m, 6H), 1.25 – 1.20 (m, 2H), 1.02 (s, 3H), 0.97 (s, 9H), 0.84 (s, 3H).

<sup>19</sup>F NMR (377 MHz, DMSO)  $\delta$  -72.98, -196.17.

HPLC  $t_R$  (Method B): 16.1 min.

HRMS: Calc  $m/z$  for ([C<sub>57</sub>H<sub>76</sub>F<sub>4</sub>N<sub>12</sub>O<sub>11</sub>S<sub>2</sub>] + H)<sup>+</sup> 1245.5207, found 1245.5265.

(1*R*,2*S*,5*S*)-*N*-((*S*)-1-Cyano-2-((*S*)-2-oxopyrrolidin-3-yl)ethyl)-3-((*R*)-3-(((1-(3-(3-(2-((*S*)-1-((*S*)-2-cyclohexyl-2-((*S*)-*N*-methyl-2-(methylamino)propanamido)acetyl)pyrrolidin-2-yl)thiazole-4-carbonyl)phenoxy)propyl)-1*H*-1,2,3-triazol-4-yl)methyl)thio)-3-methyl-2-(2,2,2-trifluoroacetamido)butanoyl)-6,6-dimethyl-3-azabicyclo[3.1.0]hexane-2-carboxamide trifluoroacetic acid (**BP-206**, *N*-Me-LCL161 linked)

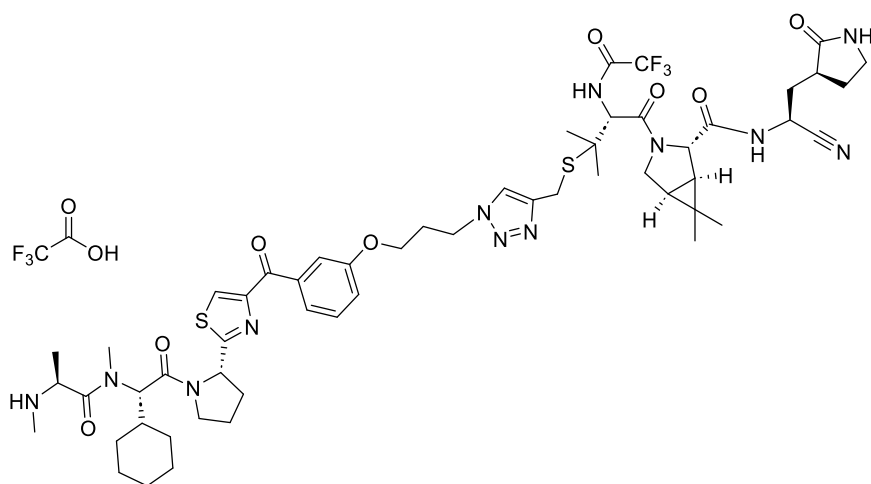

Following general procedure C, **S15** (12.8 mg, 0.023 mmol), **S9a** (0.023 mmol), sodium ascorbate (9.1 mg, 0.046 mmol), CuSO<sub>4</sub>·5H<sub>2</sub>O (7.5 mg, 0.030 mmol), and a degassed mixture of t-BuOH and H<sub>2</sub>O (0.5 mL) gave a light-yellow opaque mixture. After 18 h, workup (neutralised using NaHCO<sub>3</sub> solution), flash column chromatography (CHCl<sub>3</sub>/7M NH<sub>3</sub> in MeOH, gradient, 100:0 to 96:4), and preparative RP-HPLC provided **BP-206** as a white solid (3.9 mg, 13% over two steps, NMR indicated 10% residual ammonium trifluoroacetate).

TLC: *R<sub>f</sub>* = 0.18 (CHCl<sub>3</sub>/7M NH<sub>3</sub> in MeOH, 95:5)

<sup>1</sup>H NMR (400 MHz, DMSO) δ 9.61 (d, *J* = 8.4 Hz, 1H), 9.01 (d, *J* = 8.4 Hz, 1H), 8.93 (br s, 1H), 8.74 (br s, 1H), 8.48 (s, 1H), 7.99 (s, 1H), 7.72 – 7.63 (m, 2H), 7.61 (app s, 1H), 7.46 (t, *J* = 8.0 Hz, 1H), 5.39 – 5.34 (m, 1H), 5.05 (d, *J* = 10.8 Hz, 1H), 4.99 – 4.94 (m, 1H), 4.69 (d, *J* = 8.2 Hz, 1H), 4.55 – 4.49 (m, 2H), 4.41 – 4.36 (m, 1H), 4.14 (s, 1H), 4.06 (t, *J* = 6.0 Hz, 2H), 3.99 – 3.94 (m, 1H), 3.85 (s, 2H), 3.82 – 3.75 (m, 2H), 3.66 (d, *J* = 9.9 Hz, 1H), 3.15 – 3.12 (m, 1H), 3.06 – 3.01 (m, 1H), 2.94 (s, 3H), 2.50 (s, 3H, assumed; partially obscured by solvent peak), 2.31 – 2.22 (m, 3H), 2.20 – 2.13 (m, 2H), 2.11 – 2.04 (m, 2H), 2.00 – 1.92 (m, 2H), 1.79 – 1.51 (m, 9H), 1.48 (s, 3H), 1.38 (d, *J* = 6.8 Hz, 3H), 1.35 – 1.26 (m, 4H), 1.20 – 1.04 (m, 5H), 1.02 (s, 3H), 0.83 (s, 3H).

<sup>19</sup>F NMR (377 MHz, DMSO) δ -72.99, -73.47.

HPLC *t<sub>R</sub>* (Method B): 15.6 min.

HRMS: Calc *m/z* for [(C<sub>55</sub>H<sub>73</sub>F<sub>3</sub>N<sub>12</sub>O<sub>8</sub>S<sub>2</sub>) + H]<sup>+</sup> 1151.5141, found 1151.5140. (1*R*,2*S*,5*S*)-*N*-((*S*)-1-Cyano-2-((*S*)-2-oxopyrrolidin-3-yl)ethyl)-3-((*R*)-3-(((1-(2-(2-(2-(3-(2-((*S*)-1-((*S*)-2-cyclohexyl-2-((*S*)-*N*-methyl-2-(methylamino)propanamido)acetyl)pyrrolidin-2-yl)thiazole-4-carbonyl)phenoxy)ethoxy)ethoxy)ethyl)-1*H*-1,2,3-triazol-4-yl)methyl)thio)-3-methyl-2-(2,2,2-trifluoroacetamido)butanoyl)-6,6-dimethyl-3-azabicyclo[3.1.0]hexane-2-carboxamide trifluoroacetic acid (**BP-202**, *N*-Me-LCL161 linked)

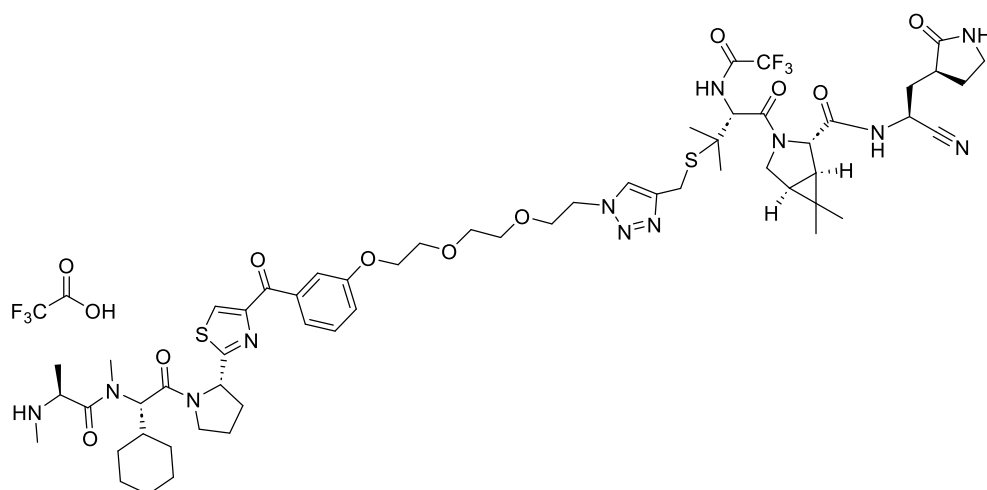

Following general procedure C, **S15** (13.0 mg, 0.023 mmol), **S9b** (0.023 mmol), sodium ascorbate (10.0 mg, 0.050 mmol), CuSO<sub>4</sub>·5H<sub>2</sub>O (9.4 mg, 0.038 mmol), and a degassed mixture of t-BuOH and H<sub>2</sub>O (0.6 mL) gave a light-yellow-brown clear mixture. After 18 h, workup (neutralised using NaHCO<sub>3</sub> solution), preparative-TLC (CHCl<sub>3</sub>/7M NH<sub>3</sub> in MeOH, 95:5) and preparative RP-HPLC provided **BP-202** as a white solid (6.2 mg, 18% over two step).

TLC:  $R_f$  = 0.17 (CHCl<sub>3</sub>/7M NH<sub>3</sub> in MeOH, 95:5)

<sup>1</sup>H NMR (400 MHz, DMSO)  $\delta$  9.62 (d,  $J$  = 8.5 Hz, 1H), 9.01 (d,  $J$  = 8.5 Hz, 1H), 8.94 (br s, 1H), 8.75 (br s, 1H), 8.47 (s, 1H), 7.90 (s, 1H), 7.73 – 7.64 (m, 2H), 7.64 – 7.59 (m, 1H), 7.46 (t,  $J$  = 8.0 Hz, 1H), 7.27 – 7.22 (m, 1H), 5.36 (dd,  $J$  = 8.1, 2.9 Hz, 1H), 5.05 (d,  $J$  = 10.9 Hz, 1H), 4.99 – 4.92 (m, 1H), 4.72 (d,  $J$  = 8.5 Hz, 1H), 4.47 (t,  $J$  = 5.3 Hz, 2H), 4.39 (q,  $J$  = 6.3 Hz, 1H), 4.18 – 4.10 (m, 3H), 3.96 (dd,  $J$  = 10.4, 5.5 Hz, 1H), 3.84 (s, 2H), 3.83 – 3.70 (m, 5H), 3.67 (d,  $J$  = 10.6 Hz, 1H), 3.55 (m, 2H), 3.50 – 3.44 (m, 1H, assumed; partially obscured by solvent peak), 3.37 – 3.37 (m, 2H, assumed; partially obscured by solvent peak), 3.15 – 3.09 (m, 1H), 3.06 – 2.99 (m, 1H), 2.93 (s, 3H), 2.51 – 2.50 (m, 3H, assumed; partially obscured by solvent peak), 2.40 – 2.34 (m, 1H), 2.30 – 2.19 (m, 2H), 2.17 – 1.92 (m, 5H), 1.79 – 1.49 (m, 8H), 1.47 (s, 3H), 1.38 (d,  $J$  = 6.9 Hz, 3H), 1.35 – 1.25 (m, 4H), 1.24 – 1.10 (m, 3H), 1.02 (s, 3H), 0.96 – 0.88 (m, 2H), 0.83 (s, 3H).

<sup>19</sup>F NMR (377 MHz, DMSO)  $\delta$  -72.98, -73.99.

HPLC  $t_R$  (Method B): 15.5 min.

HRMS: Calc  $m/z$  for ([C<sub>58</sub>H<sub>79</sub>F<sub>3</sub>N<sub>12</sub>O<sub>10</sub>S<sub>2</sub>] + H)<sup>+</sup> 1225.5508, found 1225.5515.

## 2 Selected NMR, HPLC, and HRMS spectra

### 2.1 S15

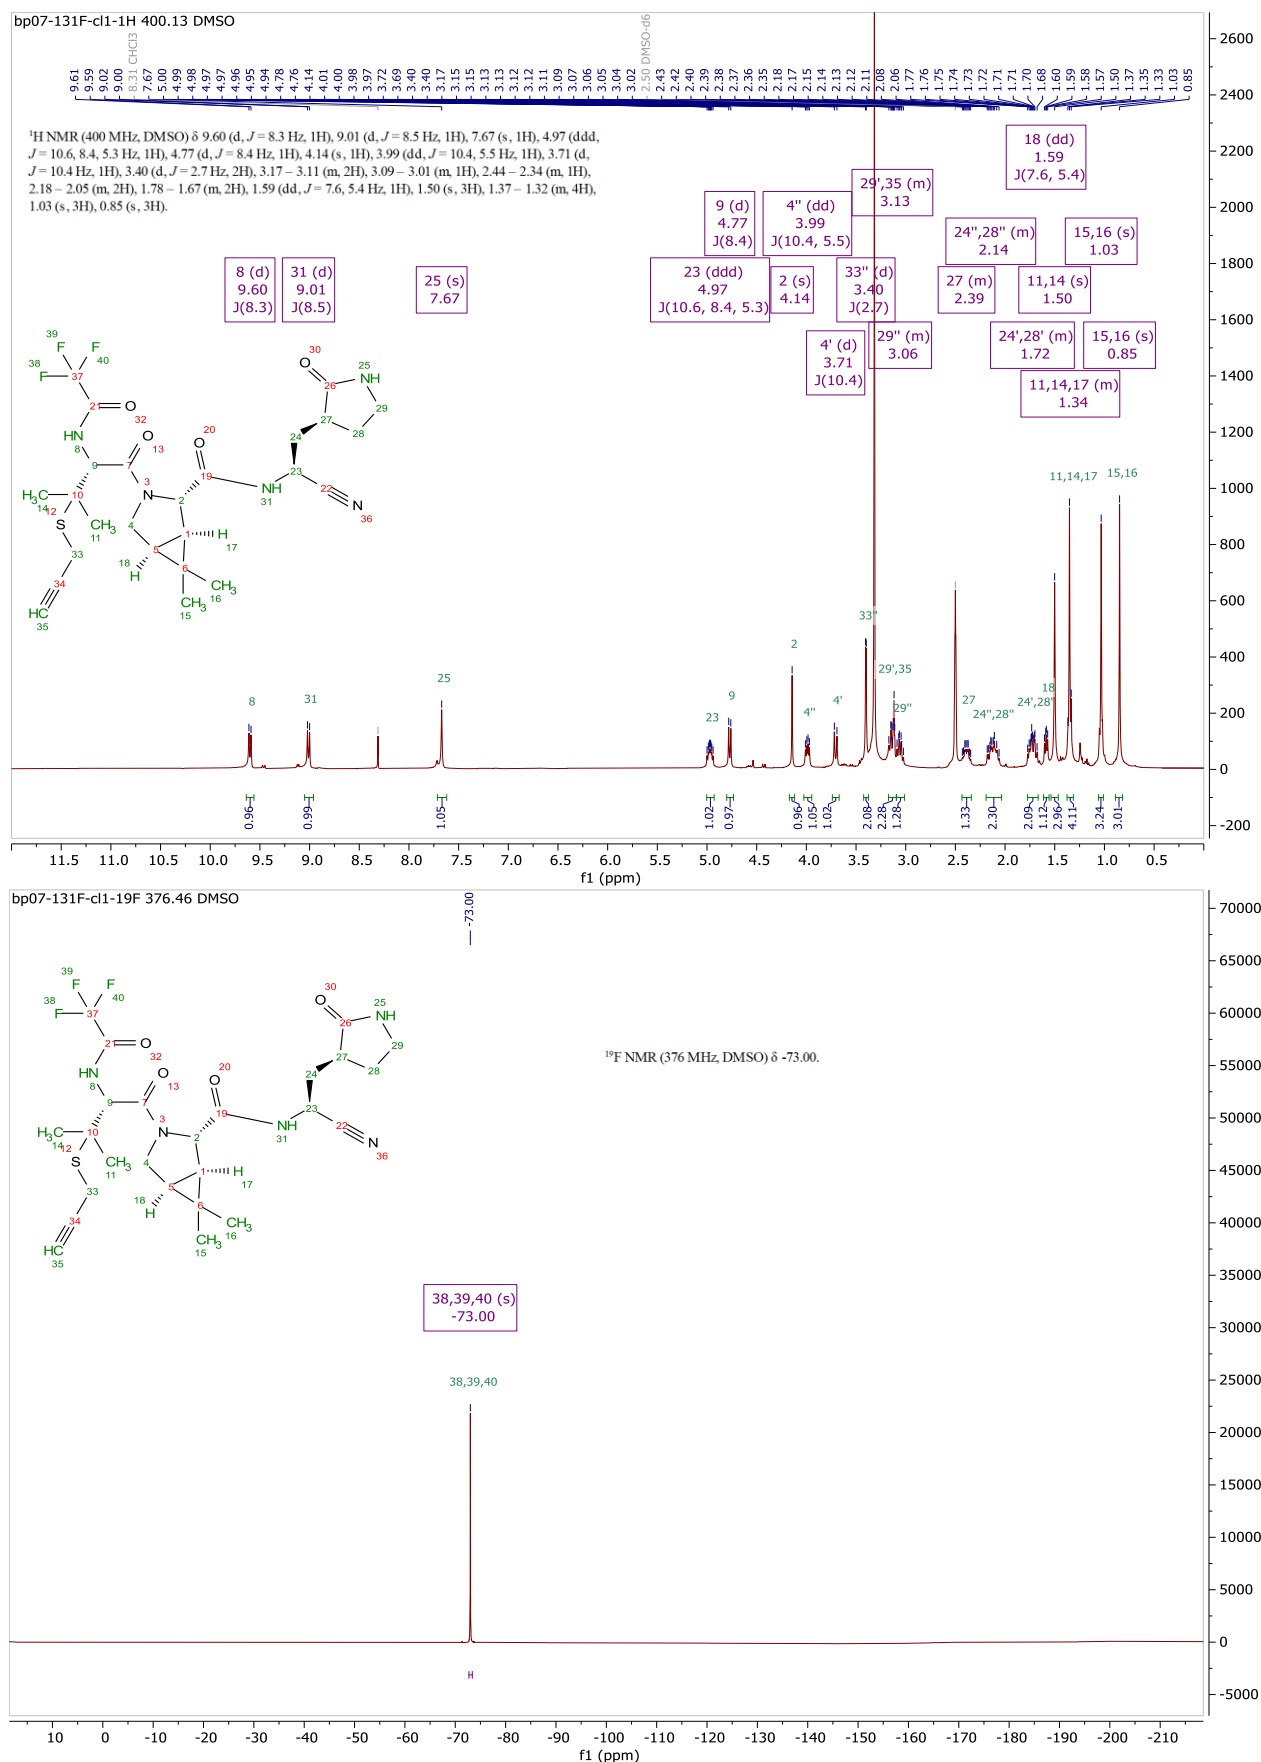

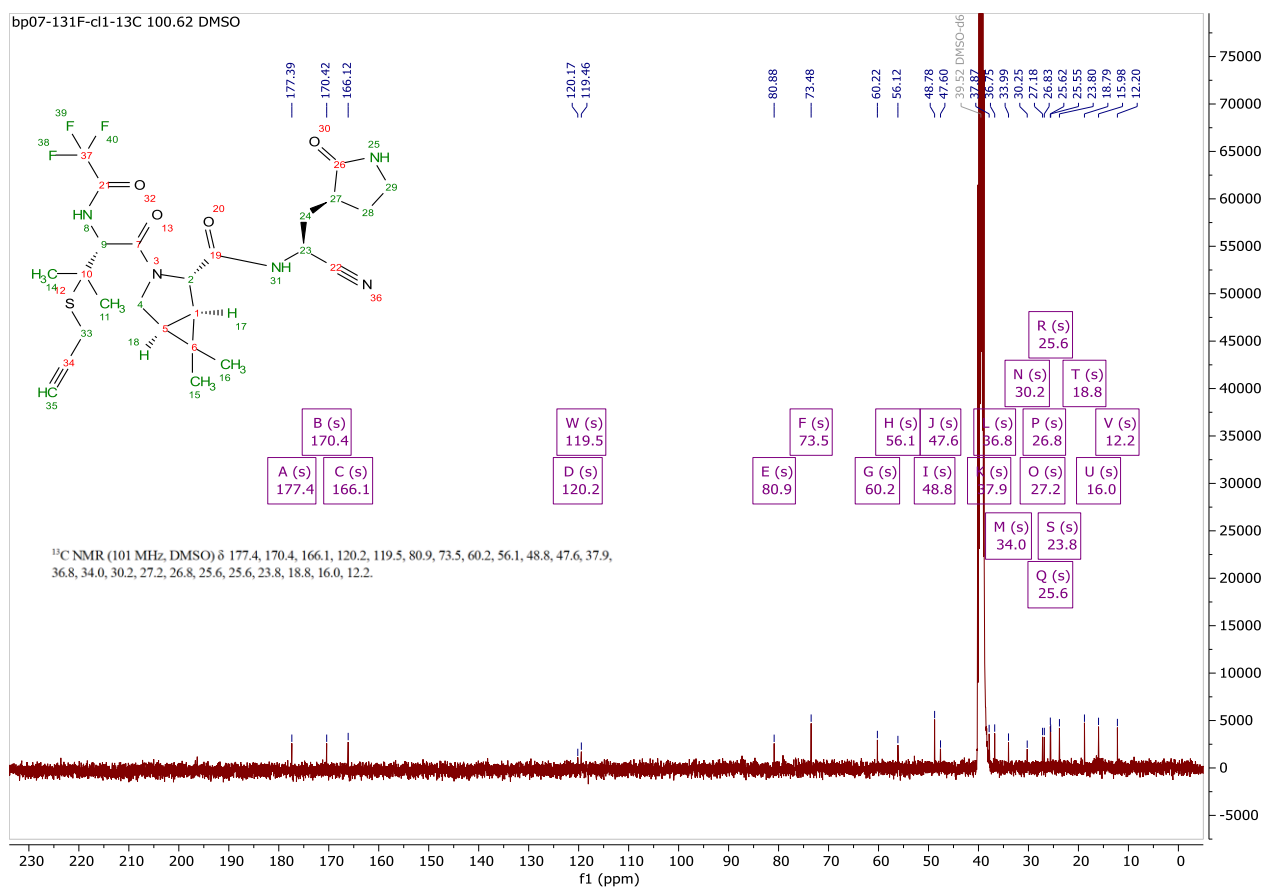

# Compound Report

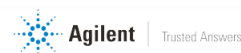

## Sample Information

|                       |               |                           |                                                                   |
|-----------------------|---------------|---------------------------|-------------------------------------------------------------------|
| <b>Name</b>           | bp07-131      | <b>Data File Path</b>     | D:\DATA\2022\May 23\bp07-131.d                                    |
| <b>Sample ID</b>      |               | <b>Acq. Time (Local)</b>  | 23/05/2022 11:30:14 AM (UTC+10:00)                                |
| <b>Instrument</b>     | Instrument 1  | <b>Method Path (Acq)</b>  | D:\MassHunter\Methods\Monash_Direct.m                             |
| <b>MS Type</b>        | TOF           | <b>Version (Acq SW)</b>   | 6200 series TOF/6500 series Q-TOF 10.1 (48.0)                     |
| <b>Inj. Vol. (ul)</b> | 0.2           | <b>IRM Status</b>         | Success                                                           |
| <b>Position</b>       | P2-D5         | <b>Method Path (DA)</b>   | D:\DATA\2022\May 23\bp07-131.d\AcqData\MethodDA\Monash_Accuracy.m |
| <b>Plate Pos.</b>     |               | <b>Target Source Path</b> | C25H32F3N5O4S                                                     |
| <b>Operator</b>       | Dr Jason Dang | <b>Result Summary</b>     | 1 qualified (1 targets)                                           |

## Compound Summary

| Formula       | RT    | Mass     | Area       | Algorithm | Score | Diff (Tgt, ppm) |
|---------------|-------|----------|------------|-----------|-------|-----------------|
| C25H32F3N5O4S | 0.109 | 555.2139 | 1930097431 | FBF       | 99.85 | 2.18            |

## Compound Chromatogram(s)

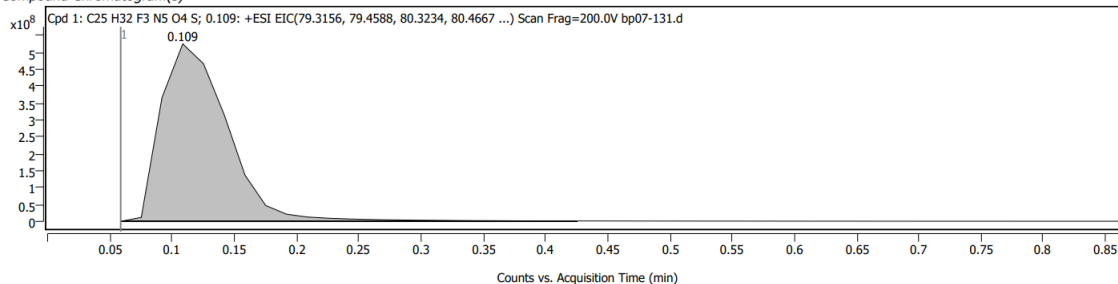

## Compound Spectra

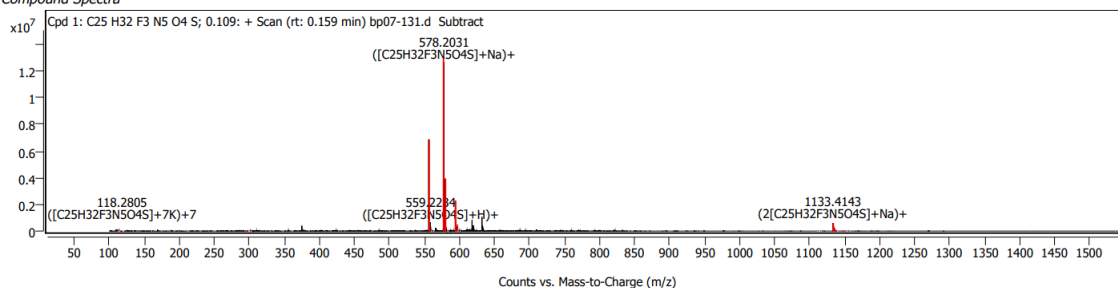

## Compound Spectra

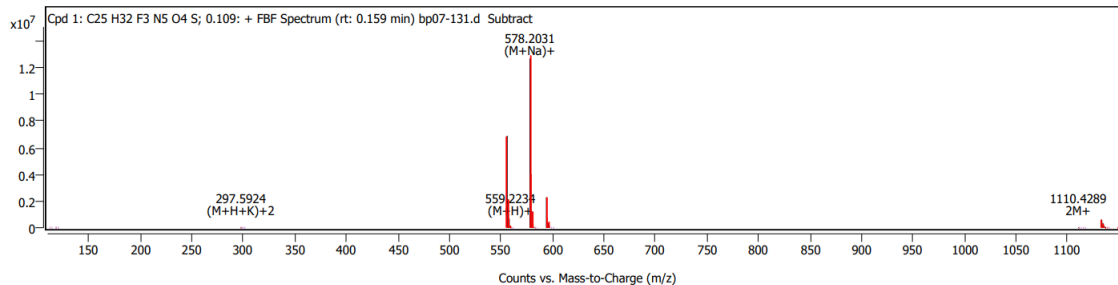

## Spectrum Peaks (Max. 3)

| m/z      | m/z (Calc) | Diff (ppm) | Abund    | Height % | Height % (Calc) | Ion Species | Z |
|----------|------------|------------|----------|----------|-----------------|-------------|---|
| 556.2209 | 556.2200   | 1.73       | 6910750  | 100.00   | 100.00          | (M+H)+      | 1 |
| 578.2031 | 578.2019   | 2.07       | 12711490 | 100.00   | 100.00          | (M+Na)+     | 1 |
| 579.2058 | 579.2048   | 1.72       | 4044811  | 31.82    | 30.18           | (M+Na)+     | 1 |

## Spectrum Peaks (Max. 3)

| m/z      | m/z (Calc) | Diff (ppm) | Abund    | Height % | Height % (Calc) | Ion Species | Z |
|----------|------------|------------|----------|----------|-----------------|-------------|---|
| 556.2209 | 556.2200   | 1.73       | 6910750  | 100.00   | 100.00          | (M+H)+      | 1 |
| 578.2031 | 578.2019   | 2.07       | 12711490 | 100.00   | 100.00          | (M+Na)+     | 1 |
| 579.2058 | 579.2048   | 1.72       | 4044811  | 31.82    | 30.18           | (M+Na)+     | 1 |

bp07-172A-cl1-f7-10-1H 400.13 DMSO

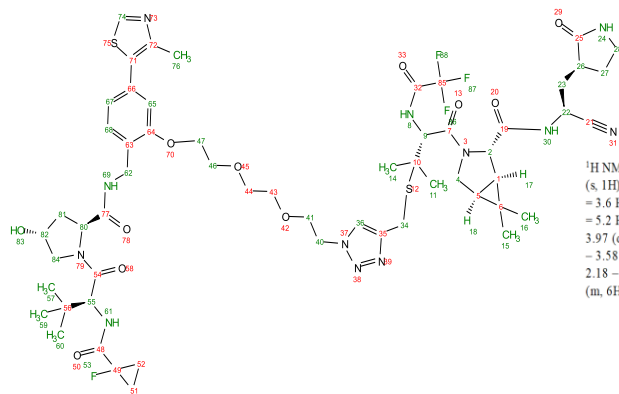

<sup>1</sup>H NMR (400 MHz, DMSO-*d*<sub>6</sub>): 5.88 (d, *J* = 8.3 Hz, 1H), 9.05 (s, 0.94 H), 8.46 (t, *J* = 5.8 Hz, 1H), 7.89 (s, 1H), 7.64 (s, 1H), 7.40 (d, *J* = 7.8 Hz, 1H), 7.27 (d, *J* = 9.2 Hz, 1H), 7.03 (d, *J* = 8.1 Hz, 1H), 6.97 (d, *J* = 7.4 Hz, 1H), 5.15 (d, *J* = 3.6 Hz, 1H), 5.04–4.91 (m, 1H), 4.72 (d, *J* = 8.1 Hz, 1H), 4.59 (d, *J* = 9.4 Hz, 1H), 4.51 (t, *J* = 8.2 Hz, 1H), 4.46 (t, *J* = 5.2 Hz, 2H), 4.36–4.31 (m, 1H), 4.29 (d, *J* = 6.1 Hz, 1H), 4.23 (d, *J* = 5.6 Hz, 1H), 4.19–4.15 (m, 2H), 4.15 (s, 1H), 3.97 (d, *J* = 10.3, 5.5 Hz, 1H), 3.84 (s, 2H), 3.80 (t, *J* = 5.2 Hz, 2H), 3.76 (t, *J* = 4.6 Hz, 2H), 3.70–3.63 (m, 2H), 3.62–3.58 (m, 3H), 3.57–3.55 (m, 2H), 3.12 (t, *J* = 8.9 Hz, 1H), 3.03 (q, *J* = 8.7 Hz, 2H), 2.46 (q, 3H), 2.41–2.33 (m, 1H), 2.18–2.05 (m, 3H), 1.96–1.88 (m, 1H), 1.77–1.64 (m, 2H), 1.57 (app t, *J* = 6.5 Hz, 1H), 1.47 (s, 3H), 1.41–1.31 (m, 6H), 1.25–1.20 (m, 2H), 1.03 (s, 3H), 0.95 (s, 9H), 0.84 (s, 3H).

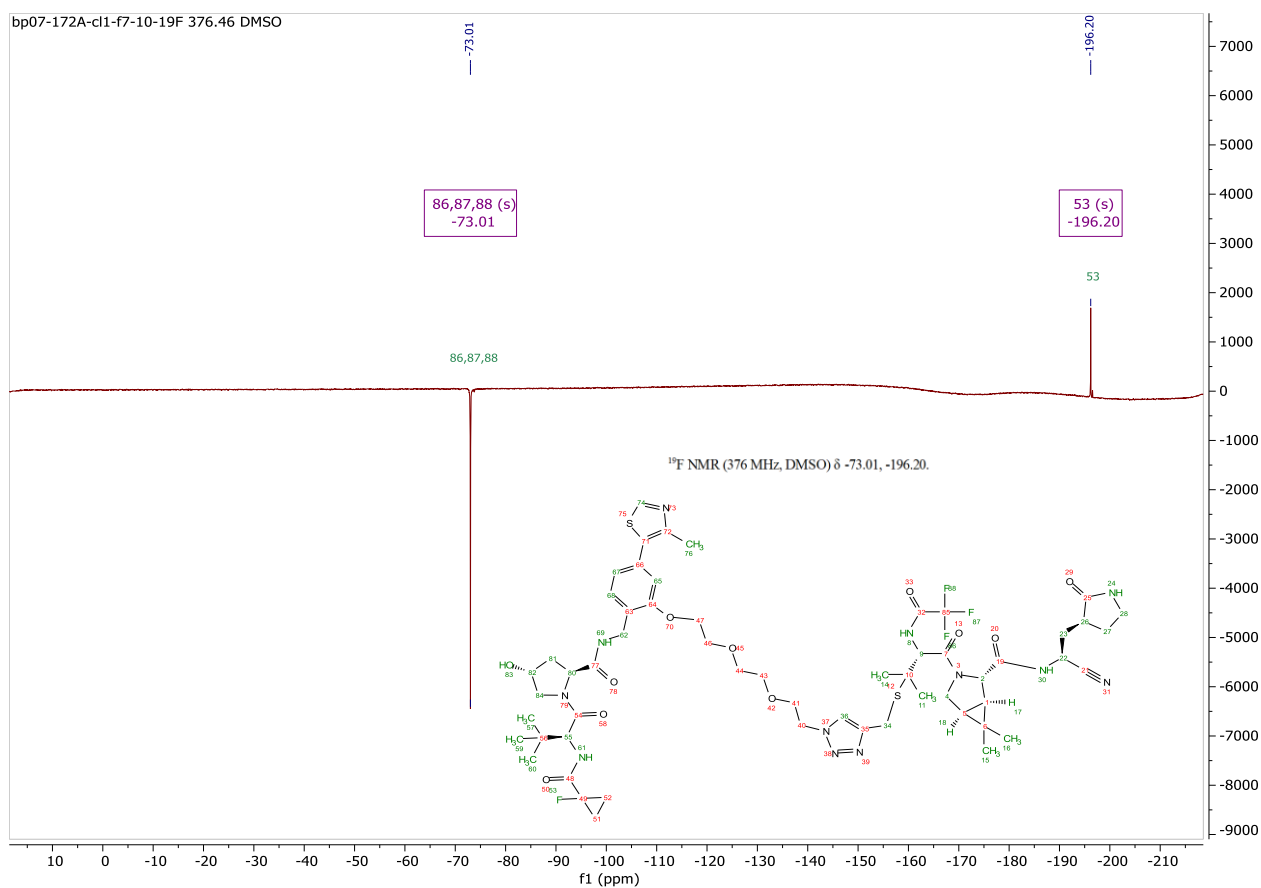



Sample Name : bp07-172A-cl1-f7-10  
 Month-Day Acquired : 8/07/2022  
 Time Acquired : 8:28:52 AM  
 Method File : LCMS 0-100B 15 min Pos.lcm

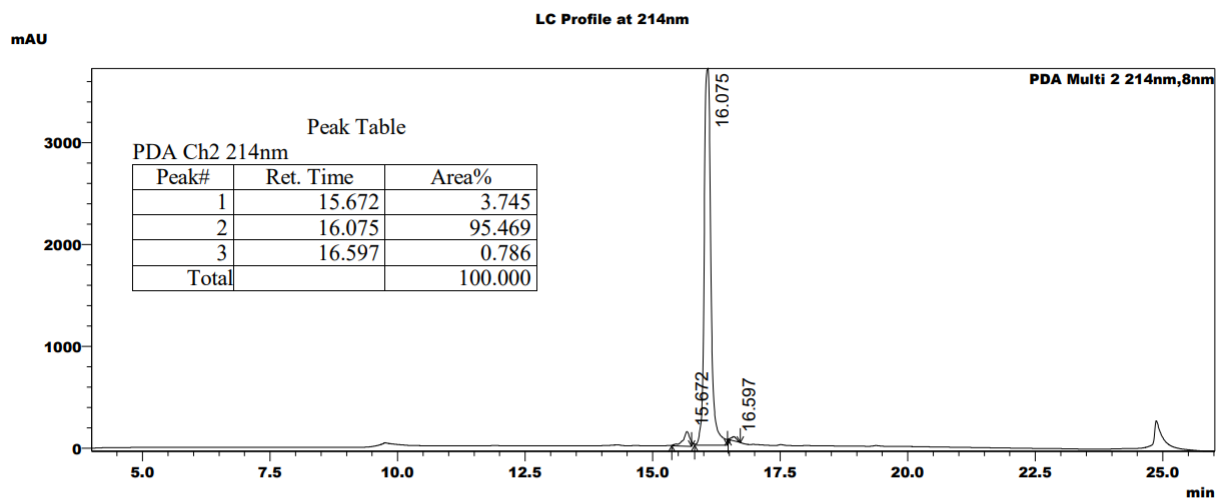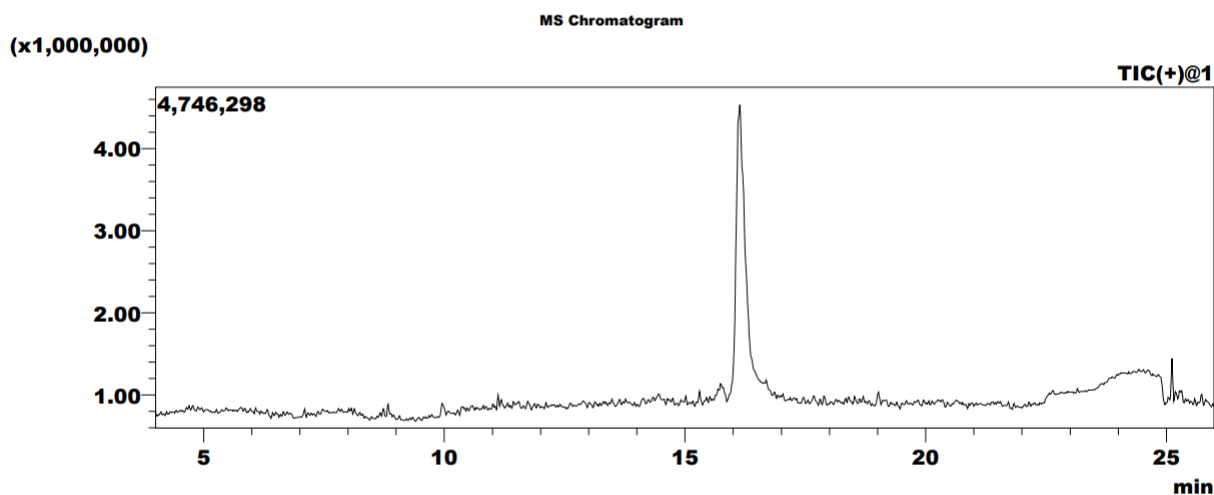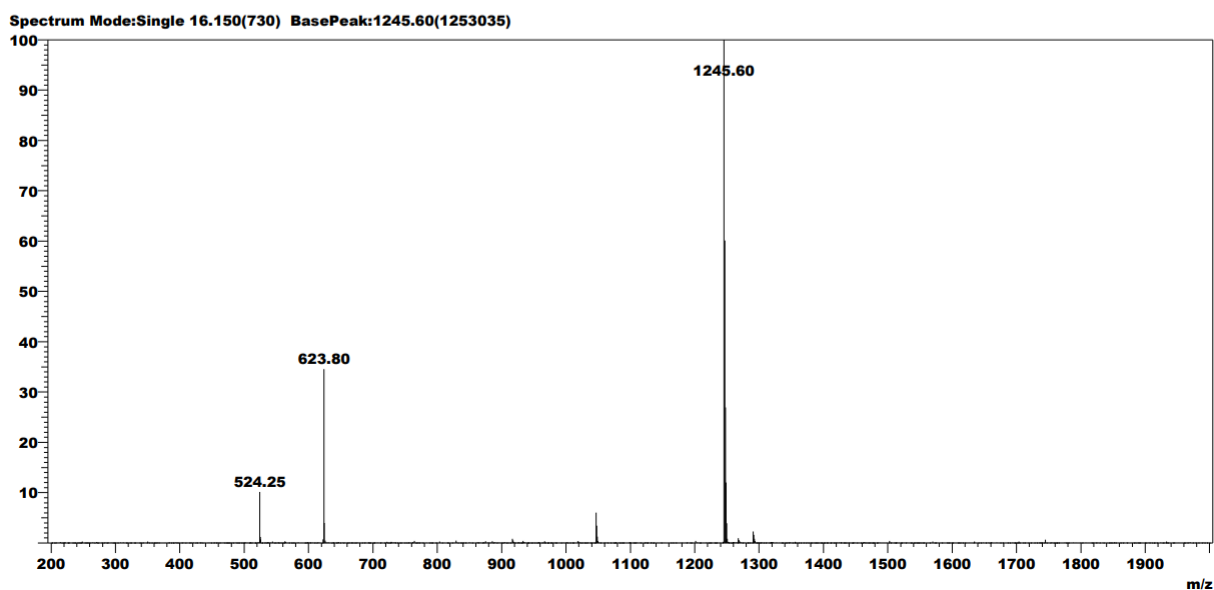

# Compound Report

## Sample Information

|                |               |                    |                                                                     |
|----------------|---------------|--------------------|---------------------------------------------------------------------|
| Name           | bp07-172A     | Data File Path     | D:\DATA\2022\July 18\bp07-172A.d                                    |
| Sample ID      |               | Acq. Time (Local)  | 18/07/2022 8:37:50 PM (UTC+10:00)                                   |
| Instrument     | Instrument 1  | Method Path (Acq)  | D:\MassHunter\Methods\Monash_Direct.m                               |
| MS Type        | TOF           | Version (Acq SW)   | 6200 series TOF/6500 series Q-TOF 10.1 (48.0)                       |
| Inj. Vol. (ul) | 0.1           | IRM Status         | Some ions missed                                                    |
| Position       | P1-A1         | Method Path (DA)   | D:\DATA\2022\July 18\bp07-172A.d\AcqData\MethodDA\Monash_Accuracy.m |
| Plate Pos.     |               | Target Source Path | C57H76F4N12O11S2                                                    |
| Operator       | Dr Jason Dang | Result Summary     | 1 qualified (1 targets)                                             |

## Compound Summary

| Formula          | RT    | Mass      | Area       | Algorithm | Score | Diff (Tgt, ppm) |
|------------------|-------|-----------|------------|-----------|-------|-----------------|
| C57H76F4N12O11S2 | 0.125 | 1244.5152 | 4846794679 | FBF       | 99.48 | 1.46            |

## Compound Chromatogram(s)

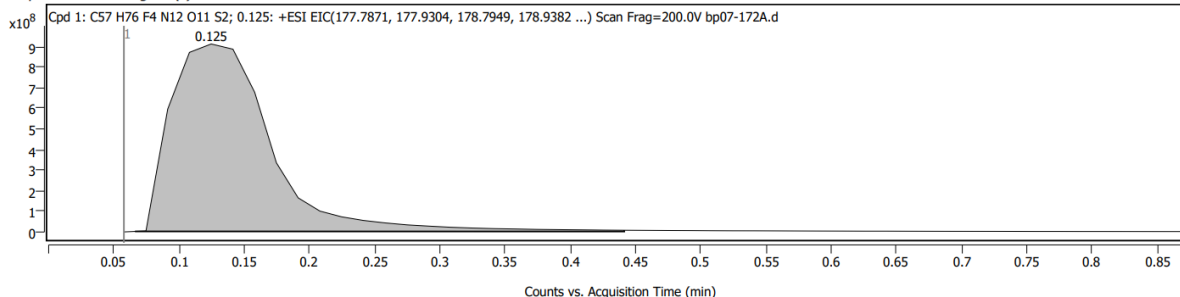

## Compound Spectra

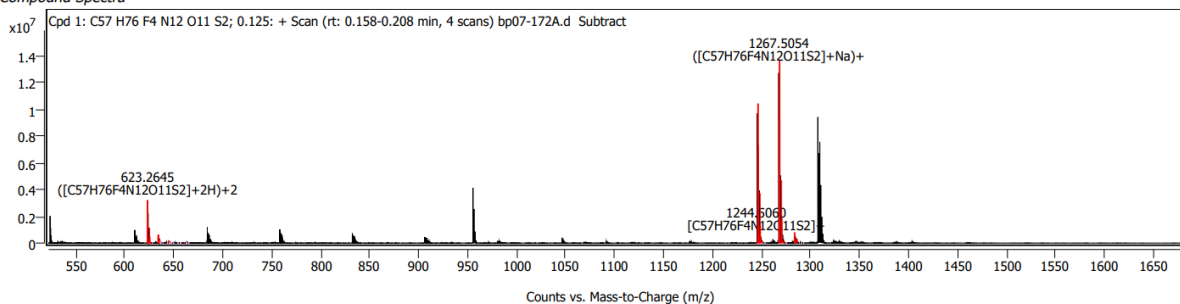

## Compound Spectra

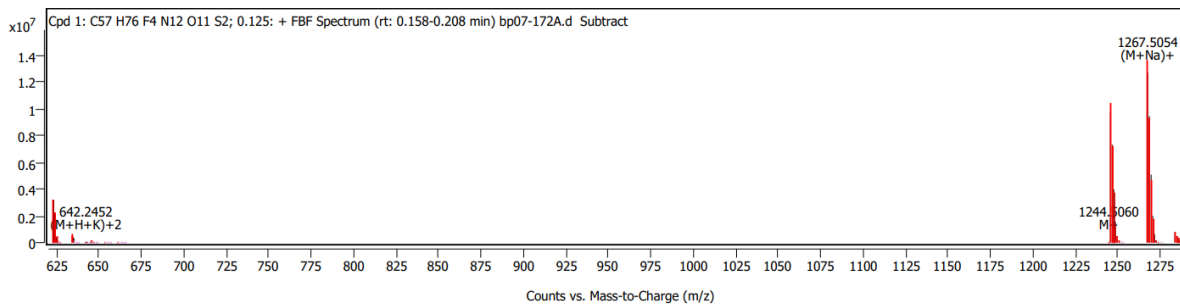

## Spectrum Peaks (Max. 3)

| m/z       | m/z (Calc) | Diff (ppm) | Abund    | Height % | Height % (Calc) | Ion Species | Z |
|-----------|------------|------------|----------|----------|-----------------|-------------|---|
| 1245.5238 | 1245.5207  | 2.53       | 9744758  | 100.00   | 100.00          | (M+H)+      | 1 |
| 1267.5054 | 1267.5026  | 2.16       | 12732351 | 100.00   | 100.00          | (M+Na)+     | 1 |
| 1268.5067 | 1268.5055  | 0.94       | 9457869  | 74.28    | 68.91           | (M+Na)+     | 1 |

## Spectrum Peaks (Max. 3)

| m/z       | m/z (Calc) | Diff (ppm) | Abund    | Height % | Height % (Calc) | Ion Species | Z |
|-----------|------------|------------|----------|----------|-----------------|-------------|---|
| 1245.5238 | 1245.5207  | 2.53       | 9744758  | 100.00   | 100.00          | (M+H)+      | 1 |
| 1267.5054 | 1267.5026  | 2.16       | 12732351 | 100.00   | 100.00          | (M+Na)+     | 1 |
| 1268.5067 | 1268.5055  | 0.94       | 9457869  | 74.28    | 68.91           | (M+Na)+     | 1 |

bp07-198C-pH1-1H 400.50 DMSO

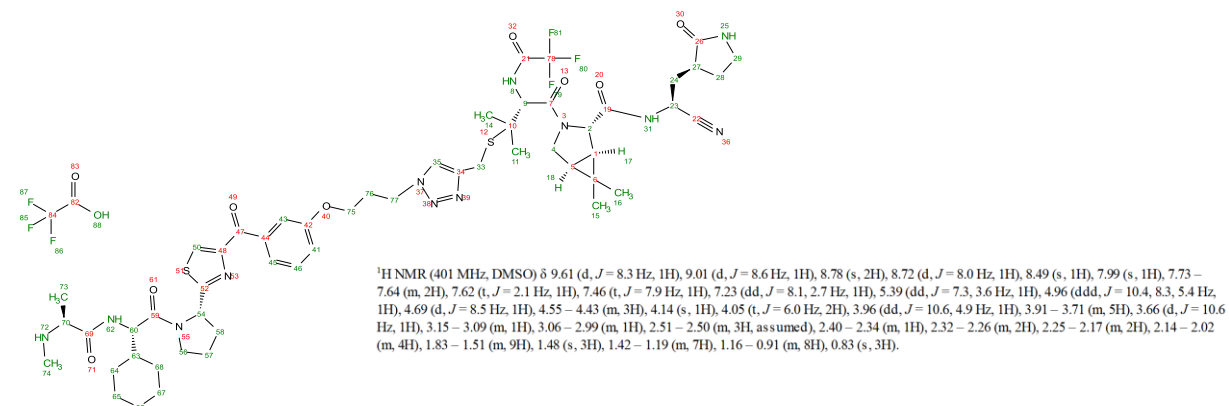

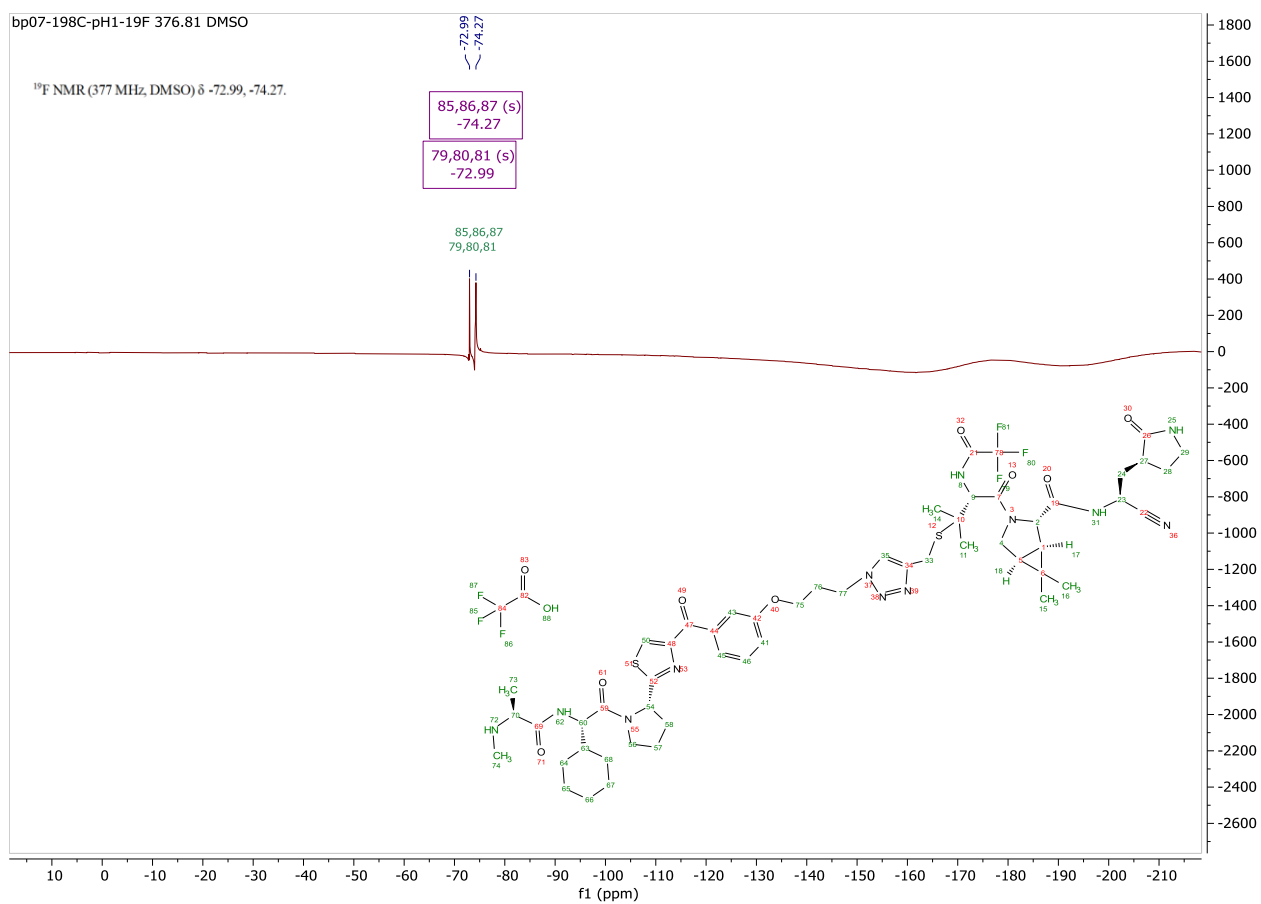

**Sample Name** : bp07-198C-p1-ccc  
**Month-Day Acquired** : 4/19/2023  
**Time Acquired** : 5:24:52 PM  
**Method File** : LCMS 0-100B 15 min Pos.lcm

| Peak Table    |           |         |
|---------------|-----------|---------|
| PDA Ch2 214nm |           |         |
| Peak#         | Ret. Time | Area%   |
| 1             | 14.877    | 0.068   |
| 2             | 15.047    | 0.681   |
| 3             | 15.418    | 99.251  |
| Total         |           | 100.000 |

mAU

LC Profile at 214nm

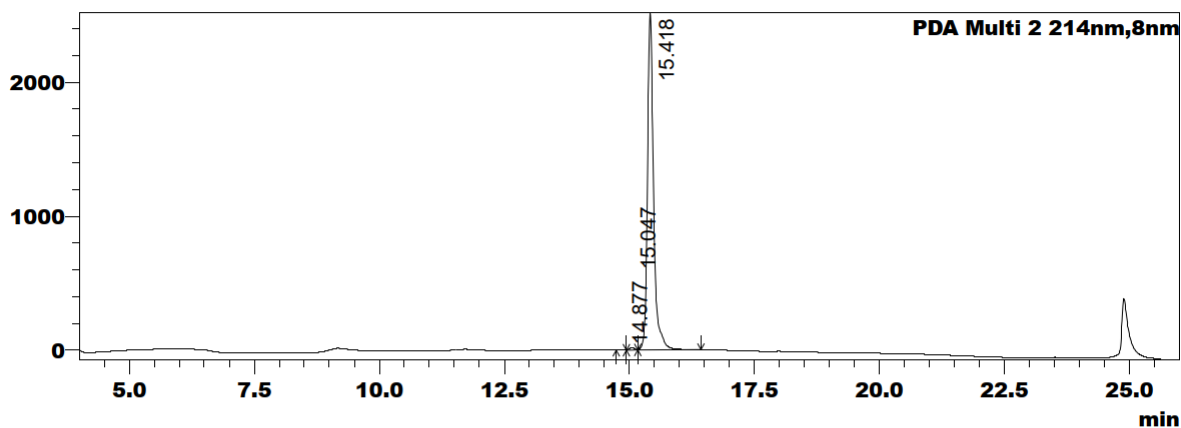

(x10,000,000)

MS Chromatogram

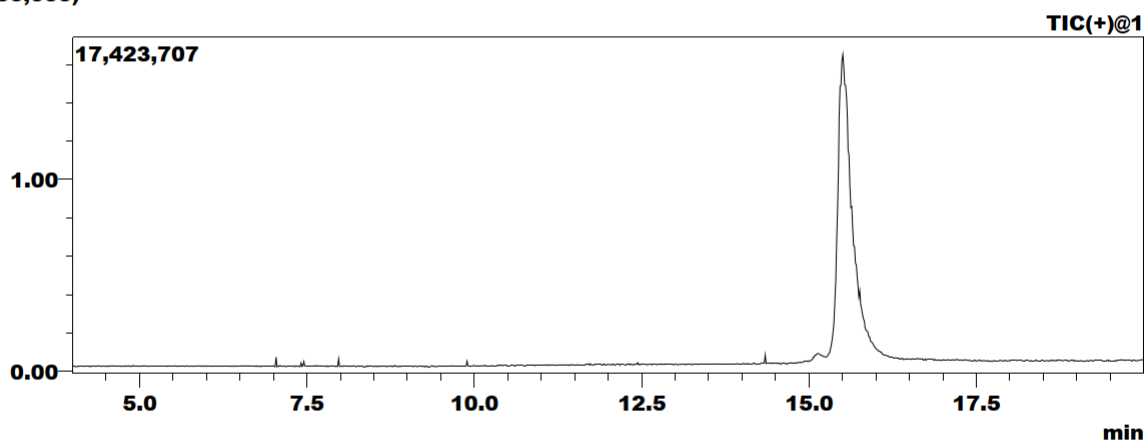

Spectrum Mode:Single 15.507(864) BasePeak:569.60(6988195)

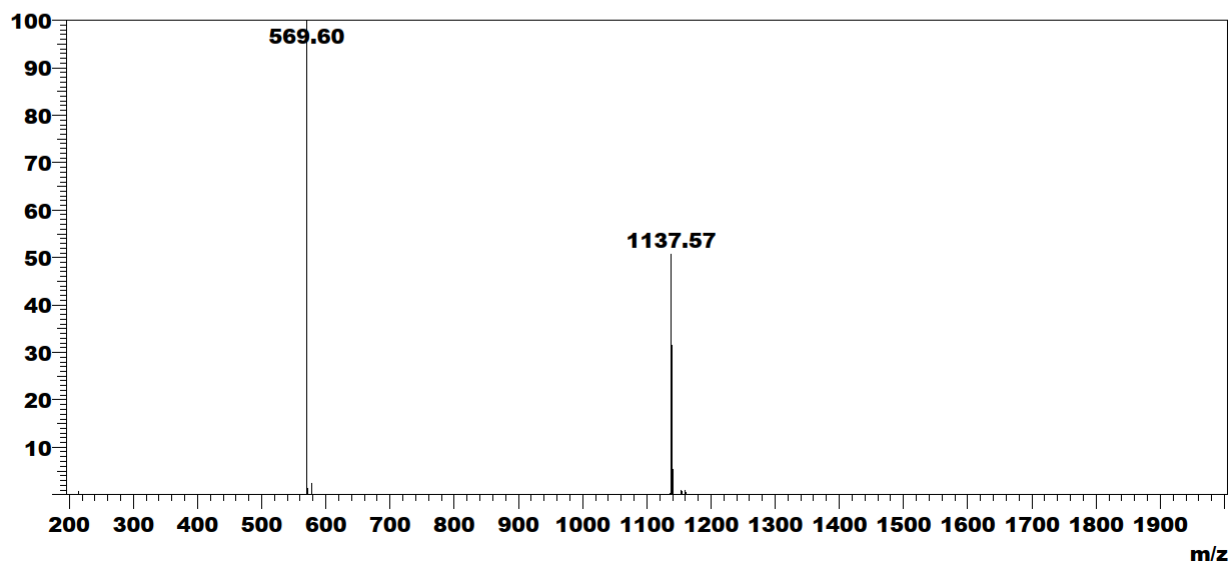

# Compound Report

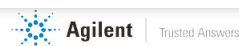

## Sample Information

|                       |               |                           |                                                                    |
|-----------------------|---------------|---------------------------|--------------------------------------------------------------------|
| <b>Name</b>           | bp07-198      | <b>Data File Path</b>     | D:\DATA\2023\April26\bp07-198.d                                    |
| <b>Sample ID</b>      |               | <b>Acq. Time (Local)</b>  | 26/04/2023 10:45:11 PM (UTC+10:00)                                 |
| <b>Instrument</b>     | Instrument 1  | <b>Method Path (Acq)</b>  | D:\MassHunter\Methods\Monash_Direct.m                              |
| <b>MS Type</b>        | TOF           | <b>Version (Acq SW)</b>   | 6200 series TOF/6500 series Q-TOF 10.1 (48.0)                      |
| <b>Inj. Vol. (ul)</b> | 0.2           | <b>IRM Status</b>         | Some Ions missed                                                   |
| <b>Position</b>       | P1-D4         | <b>Method Path (DA)</b>   | D:\DATA\2023\April26\bp07-198.d\AcqData\MethodDA\Monash_Accuracy.m |
| <b>Plate Pos.</b>     |               | <b>Target Source Path</b> | C54H71F3N12O8S2                                                    |
| <b>Operator</b>       | Dr Jason Dang | <b>Result Summary</b>     | 1 qualified (1 targets)                                            |

## Compound Summary

| Formula         | RT    | Mass      | Area      | Algorithm | Score | Diff (Tgt, ppm) |
|-----------------|-------|-----------|-----------|-----------|-------|-----------------|
| C54H71F3N12O8S2 | 0.098 | 1136.4937 | 177980078 | FBF       | 97.69 | 2.29            |

## Compound Chromatogram(s)

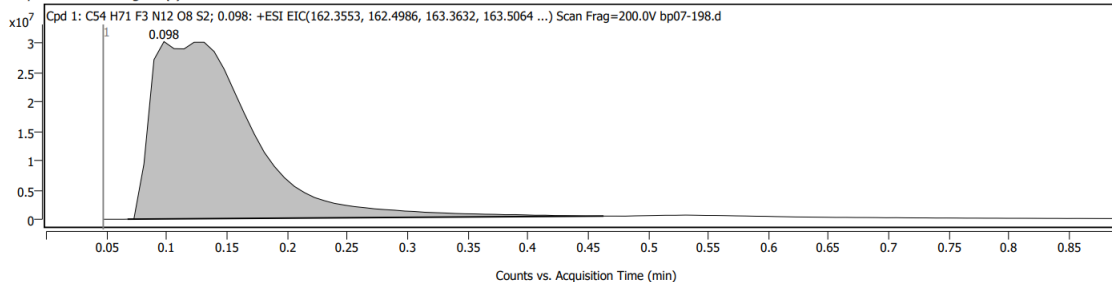

## Compound Spectra

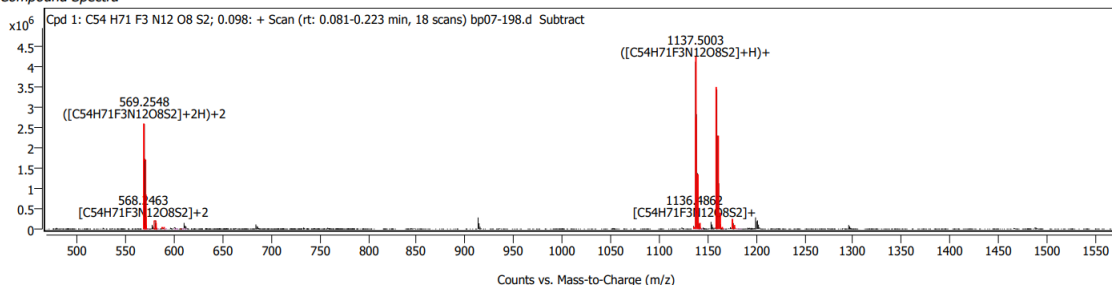

## Compound Spectra

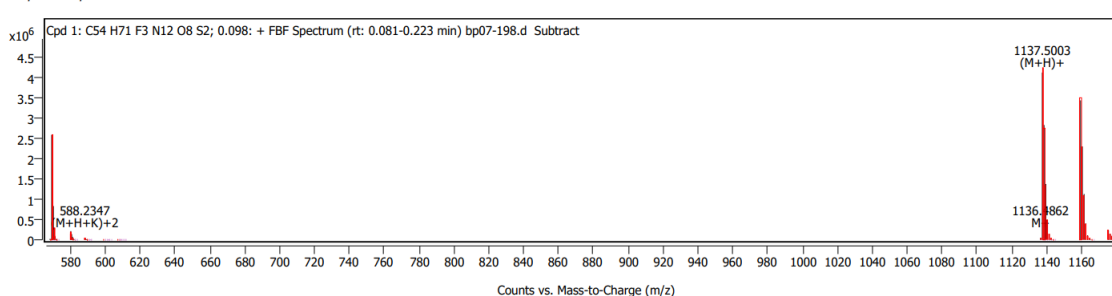

### Spectrum Peaks (Max. 3)

| m/z       | m/z (Calc) | Diff (ppm) | Abund   | Height % | Height % (Calc) | Ion Species | Z |
|-----------|------------|------------|---------|----------|-----------------|-------------|---|
| 1137.5003 | 1137.4984  | 1.64       | 4124054 | 100.00   | 100.00          | (M+H)+      | 1 |
| 1138.5032 | 1138.5013  | 1.65       | 2831444 | 68.66    | 65.50           | (M+H)+      | 1 |
| 1159.4821 | 1159.4804  | 1.54       | 3439468 | 100.00   | 100.00          | (M+Na)+     | 1 |

### Spectrum Peaks (Max. 3)

| m/z       | m/z (Calc) | Diff (ppm) | Abund   | Height % | Height % (Calc) | Ion Species | Z |
|-----------|------------|------------|---------|----------|-----------------|-------------|---|
| 1137.5003 | 1137.4984  | 1.64       | 4124054 | 100.00   | 100.00          | (M+H)+      | 1 |
| 1138.5032 | 1138.5013  | 1.65       | 2831444 | 68.66    | 65.50           | (M+H)+      | 1 |
| 1159.4821 | 1159.4804  | 1.54       | 3439468 | 100.00   | 100.00          | (M+Na)+     | 1 |

### 3 References

1. Still, W. C.; Kahn, M.; Mitra, A. Rapid chromatographic technique for preparative separations with moderate resolution. *J. Org. Chem.* **1978**, 43, 2923-2925.
2. Fulmer, G. R.; Miller, A. J.; Sherden, N. H.; Gottlieb, H. E.; Nudelman, A.; Stoltz, B. M., et al. NMR chemical shifts of trace impurities: common laboratory solvents, organics, and gases in deuterated solvents relevant to the organometallic chemist. *Organometallics* **2010**, 29, 2176-2179.
3. Zoppi, V.; Hughes, S. J.; Maniaci, C.; Testa, A.; Gmaschitz, T.; Wieshofer, C., et al. Iterative Design and Optimization of Initially Inactive Proteolysis Targeting Chimeras (PROTACs) Identify VZ185 as a Potent, Fast, and Selective von Hippel–Lindau (VHL) Based Dual Degradator Probe of BRD9 and BRD7. *J. Med. Chem.* **2019**, 62, 699-726.
4. Ohoka, N.; Okuhira, K.; Ito, M.; Nagai, K.; Shibata, N.; Hattori, T., et al. In Vivo Knockdown of Pathogenic Proteins via Specific and Nongenetic Inhibitor of Apoptosis Protein (IAP)-dependent Protein Erasers (SNIPERs). *J Biol Chem* **2017**, 292, 4556-4570.
5. Owen, D. R.; Pettersson, M. Y.; Reese, M. R.; Sammons, M. F.; Tuttle, J. B.; Verhoest, P. R., et al. Nitrile-containing antiviral compounds. WO2021250648, 2021.
6. Katritzky, A. R.; Yang, B.; Semenzin, D. (Trifluoroacetyl)benzotriazole: A Convenient Trifluoroacetylating Reagent. *J. Org. Chem.* **1997**, 62, 726-728.

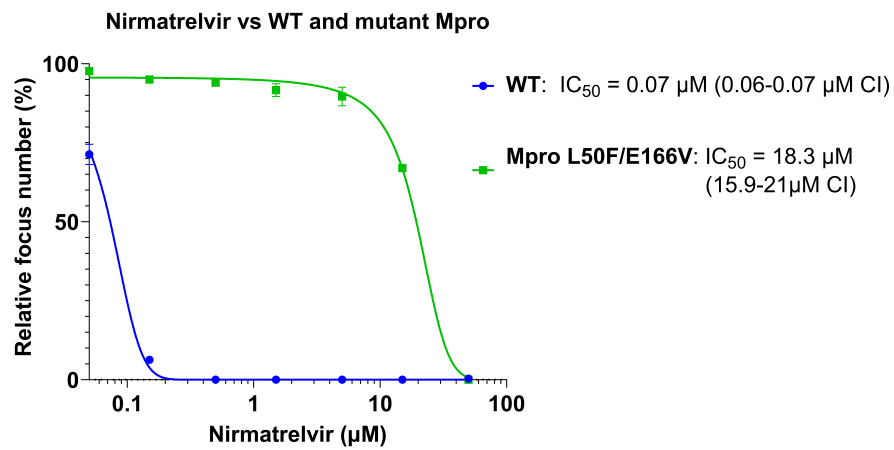

### Supplementary Figure 3

Focus reduction assays in VeroE6/TMPRSS2 cells infected with SARS-CoV-2 Delta variant harbouring either wildtype Mpro or Mpro possessing the nirmatrelvir-resistant mutations E166V + L50F and treated with increasing doses of nirmatrelvir. Data is presented as the number of foci per dose of drug as a % of the DMSO control  $\pm$  S.E.M. The  $\text{IC}_{50}$  dose response for each drug was calculated  $\pm$  95% CI.
